1 **Occidiofungin, an actin binding antifungal with *in vivo* efficacy in a vulvovaginal**  
2 **candidiasis infection**

3 **Short Title: Occidiofungin, an actin binding antifungal**

4  
5 Akshaya Ravichandran<sup>1</sup>, Mengxin Geng<sup>1</sup>, Kenneth G. Hull<sup>2</sup>, Daniel Romo<sup>2</sup>, Shi-En Lu<sup>3</sup>, Aaron  
6 Albee<sup>4</sup>, Christopher Nutter<sup>4</sup>, Donna M. Gordon<sup>4\*</sup>, Mahmoud A. Ghannoum<sup>5</sup>, Steve W.  
7 Lockless<sup>1</sup>, and Leif Smith<sup>1\*</sup>

8 <sup>1</sup> Department of Biology, Texas A&M University, College Station, TX 77843

9 <sup>2</sup> Department of Chemistry and Biochemistry and CPRIT Synthesis and Drug-Lead Discovery  
10 Laboratory, Baylor University, One Bear Place #97348, Waco, TX 76798-7348

11 <sup>c</sup> Department of Biochemistry, Molecular Biology, Entomology and Plant Pathology, Mississippi  
12 State University, 32 Creelman St., Mississippi State, MS 39762

13 <sup>4</sup> Department of Biological Sciences, Mississippi State University, Mississippi State, MS 39762

14 <sup>5</sup> Center for Medical Mycology, University Hospitals of Cleveland/Case Western Reserve  
15 University, Cleveland, OH 44106

16

17 \*Address correspondence to Leif Smith, [jsmith@bio.tamu.edu](mailto:jsmith@bio.tamu.edu) or Donna Gordon,  
18 [gordon@biology.msstate.edu](mailto:gordon@biology.msstate.edu).

19

## 20 **Abstract**

21 Current antifungal treatment options are plagued with rapidly increasing occurrence of  
22 resistance, high degree of toxicity and a limited spectrum of activity. The need to develop a novel  
23 antifungal with a unique target, wider spectrum of activity, and reduced toxicity to the host, is  
24 urgent. We have identified and characterized one such compound named occidiofungin that is  
25 produced by the soil bacterium *Burkholderia contaminans* MS14. This study identifies the primary  
26 cellular target of the antifungal, which was determined to be actin. Actin binding metabolites are  
27 generally characterized by their ability to inhibit polymerization or depolymerization of actin  
28 filaments, which presumably accounts for their severe toxicity. Occidiofungin, instead, has a  
29 subtler effect on actin dynamics that triggers apoptotic cell death. We were able to demonstrate  
30 the effectiveness of the antifungal in treating a vulvovaginal yeast infection in a murine model.  
31 This discovery puts occidiofungin in a unique class of actin-binding antifungal compounds with  
32 minimal reported toxicity to the host. The results of this study are important for the development  
33 of a novel class of antifungals that could fill the existing gap in treatment options for fungal  
34 infections.

35

36

## 37 **Author summary**

38 Widespread resistance to antifungal compounds currently in use has been alarming.  
39 Identification and development of a new class of antifungals with a novel cellular target is  
40 desperately needed. This study describes the assays carried out to determine the molecular target  
41 and evaluate efficacy of one such novel antifungal compound called occidiofungin. Occidiofungin  
42 modified with a functional alkyne group enabled affinity purification assays and localization

43 studies in yeast. These studies led to the identification of the actin binding property of  
44 occidiofungin. Actin-binding by secondary metabolites often exhibit severe host toxicity, but this  
45 does not appear to be the case for occidiofungin. We have previously been able to administer  
46 occidiofungin to mice at concentrations in the range of 5 mg/kg without any serious complications.  
47 We were able to demonstrate the effectiveness of the antifungal in treating a vaginal fungal  
48 infection in a murine model. The results outlined in this manuscript establish that occidiofungin is  
49 an efficacious compound with a novel molecular target, putting it in a completely new class of  
50 antifungals.

51

## 52 **Introduction**

53 Fungal infections caused by pathogens that are resistant to commonly used classes of  
54 antifungals are becoming increasingly prevalent. Recently, a CDC report described the spread of  
55 multi-drug resistant *Candida auris* causing systemic infections in hospitalized patients [1].  
56 Furthermore, other species such as *Candida glabrata* and *Candida parapsilosis* have been reported  
57 to have gained resistance to routinely used azoles and echinocandins [2-4]. An example of a fungal  
58 infection that is rapidly developing resistance to currently available forms of treatment is  
59 vulvovaginal candidiasis (VVC). VVC will affect approximately 75% of all women and 5-10%  
60 of all women will develop recurrent VVC (RVVC) [5-7]. Approximately 90% of VVC is caused  
61 by *C. albicans*, while the remaining 10% is caused by *C. glabrata*, *Candida tropicalis*, *Candida*  
62 *parapsilosis*, and *Candida krusei*. These non-albicans VVC causing species are generally resistant  
63 to azole treatments, which are the most common treatment option for VVC [3, 8]. There have been  
64 no new therapeutic developments in decades for recurrent VVC. In the absence of well-established  
65 medical treatment standards, several ineffective methods for treating VVC have been prescribed,

66 which generally include the use of a rigorous dosing regimen of antifungals followed by a long  
67 period of prophylactic dosing [5, 9, 10].

68 *Candida* species are an important cause of infection and mortality in all hospitalized  
69 patients[11]. Candidemia has a mortality rate of 30%–50% in cancer patients and is a major  
70 complicating factor for the successful treatment of cancer. Despite current antifungal drugs,  
71 invasive fungal infections are still a major cause of morbidity and mortality in transplant patient  
72 population[12, 13]. Reports suggest that candidal infection is the first and second most common  
73 infection in lung and heart transplant recipients, respectively[14-17]. In heart transplant recipients,  
74 candidal disease has been attributed to a mortality rate of 28%[18]. A rise in candidemia caused  
75 by non-albicans *Candida* spp. and an increase in azole resistance[19-23] is alarming; and supports  
76 the need for new antifungals. This problem is expected to be exacerbated by the presence of the  
77 multidrug resistant fungi *Candida auris* in hospitals. The increase in *C. auris* infections is expected  
78 to further reduce the positive therapeutic outcomes associated with currently approved antifungals  
79 [21]. Additionally, more appropriate antifungal treatment options may reduce the cost of treatment  
80 and mortality of patients.

81 Clinically approved antifungals primarily comprise members of the polyene, echinocandin,  
82 and azole family of compounds. The polyene antifungal amphotericin B was introduced in the  
83 1950s and was the only antifungal available until the introduction of the azole class of antifungals  
84 in the 1980s. These two groups primarily target ergosterol production or bind to ergosterol,  
85 disrupting the fungal membrane. The echinocandins, the third group, are synthetically modified  
86 lipopeptides that originate from a natural cyclic peptide compound produced by fungi. This group  
87 selectively inhibits 1,3- $\beta$ -glucan synthesis by functioning as a non-competitive inhibitor of 1,3- $\beta$ -  
88 glucan synthase [24-27]. Widespread resistance and the ineffective spectrum of activity of this

89 class of antifungals have been reported [28-32]. The prevalence of echinocandin- and azole-  
90 resistant fungal pathogens and the limited spectrum of activity of those compounds is one major  
91 issue contributing to the need for a new class of antifungals. Additionally, current antifungal  
92 treatments lead to abnormal liver and kidney function tests and have limitations with respect to  
93 their spectrum of activity and toxicities [33, 34]. Presumably, the identification of a novel class of  
94 antifungals with a broad spectrum of activity and a unique mechanism of action would mitigate  
95 the loss of life associated with the use of the current classes of antifungals. These limitations and  
96 toxicity problems have created an urgent need to identify antifungal compounds that have a novel  
97 mechanism of action [35].

98 Occidiofungin is a non-ribosomally synthesized glycolipopeptide produced by the soil  
99 bacterium *Burkholderia contaminans* MS14 [36]. It is a cyclic peptide with a base mass of 1200  
100 Da (Fig 1). The bacterium produces a mixture of structural analogs of the base compound  
101 (occidiofungins A-D), however all analogs are composed of eight amino acids and a novel C18  
102 fatty amino acid (NAA) containing a xylose sugar, and a 2,4- diaminobutyric acid (DABA). The  
103 structural analogs differ by an addition of oxygen to asparagine 1 (Asn1) forming a  $\beta$ -hydroxy  
104 asparagine 1 (BHN1) and by the addition of chlorine to  $\beta$ -hydroxy tyrosine 4 (BHY) forming 3-  
105 chloro  $\beta$ -hydroxy tyrosine 4 (chloro-BHY) [36]. Occidiofungin has a wide spectrum of activity  
106 against filamentous and non-filamentous fungi and minimal toxicity in an animal system [36, 37].  
107 We have previously demonstrated that the mechanism of action of occidiofungin differs from the  
108 primary mode of action of the three common classes of antifungals [38, 39]. Briefly, there was no  
109 decrease in the activity of occidiofungin against *C. albicans* in the presence of 0.8 M sorbitol, an  
110 osmotic stabilizer, indicating that occidiofungin was not causing osmotic stress by cell wall or  
111 membrane disruption (the primary mechanism of action of azoles). Further, upregulation of

112 Hog1p, which is an osmotic disruption indicator, was significantly lower than that seen for  
113 conditions known to induce the osmotic stress response pathway (e.g. 1 M NaCl). Mutants lacking  
114 Fks1p, an enzyme in the cell wall biosynthesis pathway, did not demonstrate increased resistance  
115 to occidiofungin. Disruption of the Fks1/Fks2 complex is the primary mechanism of action of  
116 echinocandins. Additionally, the introduction of vesicles containing ergosterol, the target of  
117 amphotericin, did not reduce the activity of occidiofungin unlike the case with amphotericin B.  
118 When observed under a microscope, occidiofungin-treated cells did not undergo lysis but appeared  
119 shrunken in size. Additional assays indicated that occidiofungin rapidly induces apoptosis in yeast  
120 cells at the minimum inhibitory concentration [39]. Interestingly, a critical threshold concentration  
121 of occidiofungin is required for its observed fungicidal activity. Occidiofungin has little impact on  
122 the growth rate of yeast at sub-inhibitory concentrations [38]. In addition, occidiofungin was seen  
123 to have potent inhibitory activity against *Pythium* species which lacks ergosterol in the membrane  
124 and against *Cryptococcus neoformans* which is resistant to echinocandins [36]. Preliminary  
125 toxicological analyses of occidiofungin using a murine model indicated that it was well tolerated  
126 at concentrations of 10 to 20 mg/kg [37]. Intravenous administration of occidiofungin to mice at a  
127 dose of 5 mg/kg was carried out with minimal induced toxicity. Blood chemistry analyses and  
128 histopathology performed on multiple organs showed a transient non-specific stress response with  
129 no damage to organ tissues [40]. Taken together, the data suggest that occidiofungin is a promising  
130 candidate for development as a clinically useful antifungal agent. This report describes studies to  
131 identify the molecular target of occidiofungin and determine its efficacy in a murine model of  
132 vulvovaginal candidiasis.

133 Fig 1. Covalent structure of occidiofungin A-D and alkyne-OF.

## 134 **Results**

135 **Spectrum of activity of occidiofungin against clinically relevant fungi.**

136 Occidiofungin causes cell death in fungi through a mechanism of action that is distinct  
137 from the clinically used classes of antifungals [39]. Due to its unique mechanism of action,  
138 occidiofungin has sub-micromolar activity against azole and echinocandin resistant strains of  
139 fungi. Strains of *Candida albicans*, *Candida glabrata*, and *Candida parapsilosis* that were  
140 resistant to fluconazole and caspofungin were sensitive to occidiofungin (S1 Table). Furthermore,  
141 strains of *C. auris* were sensitive to occidiofungin at sub-micromolar concentrations. Non-albicans  
142 strains are believed to be the primary cause of recurrent vulvovaginal candidiasis. Strains of  
143 *Candida parapsilosis* and *C. neoformans* that were resistant to treatment with caspofungin were  
144 found to be susceptible to treatment with occidiofungin. Occidiofungin was also found to be active  
145 against *Aspergillus*, *Mucor*, *Fusarium*, and *Rhizopus* species. Several strains of the dermatophyte  
146 *Trichophyton* were also found to be susceptible to occidiofungin treatment, including azole and  
147 terbinafine resistant strains. A summary of the results, as reported in S1 Table, indicate that  
148 occidiofungin has activity against filamentous and non-filamentous fungi at sub-micromolar  
149 concentrations and has a broader spectrum of activity compared to other clinically available  
150 antifungals. Furthermore, sensitivity of fungal strains resistant to azoles and echinocandin class of  
151 antifungals support the notion that occidiofungin is functioning via a novel mechanism of action.

152 **Perturbation of actin-based functions following occidiofungin exposure.**

153 As a dimorphic fungus, *C. albicans* can grow as yeast or hyphae and the ability to switch  
154 between these forms is linked to the pathogenicity of the organism [41]. As most studies on  
155 occidiofungin efficacy have been carried out on *C. albicans* in their yeast form, the impact of the  
156 antifungal on morphological switching was tested. Incubation of *C. albicans* with sub-inhibitory  
157 concentration of occidiofungin was shown to block hyphae formation in cells that were induced to

158 undergo morphological switching (Fig 2). Morphogenesis of *C. albicans* from yeast to filamentous  
159 forms has been shown to involve actin dynamics as treatment with cytochalasin A, latrunculin A,  
160 or the elimination of myosin I function prevent hyphae formation [42, 43]. In *C. albicans*,  
161 maintenance of the actin scaffold is also necessary for endocytosis, DNA segregation, and cell  
162 division [44, 45]. To determine whether occidiofungin impacts other cellular activities linked to  
163 actin dynamics, the effect of occidiofungin on endocytosis in fission yeast was evaluated by  
164 staining cells with FM-464 (Fig 3). Cells exposed to 0.5X MIC and 1X MIC demonstrated a  
165 concentration dependent reduction in stained endocytic vesicles. Actin has also been linked to the  
166 proper positioning of the mitotic spindle during cell division, and mutants that lack actin cables  
167 have been shown to accumulate multinucleated cells [46, 47]. Within thirty minutes of exposure,  
168 both *S. cerevisiae* and *C. albicans* cultures treated with a sub-inhibitory concentration of  
169 occidiofungin were found to accumulate a low percentage of binucleated cells indicative of a  
170 disruption or a delay in nuclear transit through the mother-daughter neck (S2 Table). To further  
171 characterize the role of actin in cellular response to occidiofungin, we analyzed haploid *S.*  
172 *cerevisiae* mutants deleted for genes linked to actin polymerization and depolymerization. Of the  
173 eighteen strains tested, only the  $\Delta tpm1$  mutant showed altered sensitivity to occidiofungin, with  
174 the deletion mutant exhibiting a four-fold resistance to occidiofungin [S3 Table]. The observed  
175 increase in resistance to occidiofungin in the absence of the *tpm1* gene, which codes for the major  
176 isoform of tropomyosin, may be due to the mutant's increased tolerance of cellular stressors  
177 (unpublished data) or a decrease in cellular growth rate [48]. A decrease in cellular growth has  
178 previously been linked to occidiofungin resistance [49]. The lack of an observed effect on  
179 occidiofungin activity with the vast majority of the major actin associated proteins suggests that  
180 they are not directly involved in the observed inhibitory activity of occidiofungin.



181 Fig 2. *Candida albicans* morphology under hyphae inducing conditions. (A) The resulting  
182 morphology was scored as either ‘yeast’ or ‘filamentous’ at two hours and the resulting percent  
183 given. The data is presented as the average with the standard deviation for over 200 cells from  
184 each treatment condition (n=3). (B) The resulting cell morphology was scored as either ‘yeast’ or  
185 ‘filamentous’ after 0, 1, 2, 4, and 6 hours at 37°C. The data is presented as the average with the  
186 standard deviation for over 200 cells from each treatment condition (n=3). DMSO treated samples  
187 are represented by triangles; Occidiofungin treated samples represented by circles.

188 Fig 3. Effect of the native occidiofungin on endocytosis in fission yeast. DIC (top row) and  
189 fluorescence (bottom row) images of cells stained using FM-464 following treatment with sample  
190 blank (left column), 0.5X MIC of occidiofungin (middle column), and 1X MIC occidiofungin (last  
191 column). FM-464 dye uptake by endocytosis decreases in cells exposed to occidiofungin a dose  
192 dependent fashion.

### 193 **Alkyne derivatization of occidiofungin.**

194 In order to localize occidiofungin in yeast and to identify its cellular binding partners,  
195 methods to fluorescently label or add a functional purification tag to occidiofungin were needed.  
196 To this end, occidiofungin was chemically modified with a terminal alkyne through acylation of  
197 the free amino group of the diamino butyric acid residue at position 5 (S1 Figure) for subsequent  
198 click chemistry (Sharpless-Huisgen cycloaddition). Structural analysis of the derivatized product  
199 (S2 Figure and S3 Figure) revealed that occidiofungin (OF-B) and burkholdine (Bk-1215)[50],  
200 isolated by Schmidt, are likely identical products. The modified occidiofungin, alkyne-OF, had an  
201 eight-fold reduction in activity with the minimum inhibitory concentration of 1 and 0.5 µg/mL  
202 against *Saccharomyces cerevisiae* BY4741 and *Schizosaccharomyces pombe* 972 h-, respectively  
203 (S4 Table). To determine whether alkyne-OF still had the same apoptosis inducing bioactivity as  
204 the native occidiofungin, *S. cerevisiae* was treated with alkyne-OF and apoptotic assays such as  
205 TUNEL, reactive oxygen species (ROS) detection, and phosphatidylserine externalization assays  
206 were performed. Double stranded DNA breaks, the generation of ROS, and the externalization of  
207 phosphatidylserine were observed in the alkyne-OF treated cells, supporting the same mechanism

208 of action (S4 Figure A-C). Although this alkyne modification moderately reduced the inhibitory  
209 activity of the compound, the functionalized derivative has the same apoptotic bioactivity and was  
210 therefore used to identify the fungal target.

211

## 212 **Identification of occidiofungin interacting proteins.**

213 Alkyne-OF was used in a pull-down assay to identify intracellular proteins that directly or  
214 indirectly interact with occidiofungin (Fig 4A). In brief, alkyne-OF was incubated with *S.*  
215 *cerevisiae* cells and the resulting cell lysates subsequently reacted with biotin-azide with  
216 occidiofungin-interacting proteins captured by passage over streptavidin beads. In the SDS PAGE  
217 gel, samples that included alkyne-OF had a more pronounced Coomassie blue stained band of  
218 captured proteins compared to control samples (Fig 4A). These bands were removed from the SDS  
219 PAGE gel for subsequent LC-MS/MS analysis. A silver stained gel containing samples  
220 electrophoresed to completion is provided to further show that the alkyne-OF was more efficient  
221 at capturing proteins in the pull-down assay. Data from multiple analyses using *S. pombe* 972h-  
222 and *S. cerevisiae* BY4741 were pooled. The resulting list of proteins obtained following LC-  
223 MS/MS analysis of excised bands was distilled as follows. Proteins that were observed in the two  
224 control samples, DMSO treated and native occidiofungin treated, were removed from  
225 consideration resulting in proteins that were exclusively found in the test sample captured with the  
226 alkyne-OF variant (S5 Table). The culled protein list was grouped based on gene ontology  
227 including cellular localization and/or molecular function. The resulting distribution is presented in  
228 Fig 4B. This analysis revealed that the majority of the proteins pulled down by alkyne-OF were  
229 actin or actin associated proteins (e.g. Pil1 and Cap1). In addition to actin-related proteins, proteins  
230 involved in vesicle transport and mannosylation were found associated with alkyne-OF. The

231 remaining proteins were ribosomal and mitochondrial related proteins. The data indicates that  
232 occidiofungin plays a role in binding to actin since a majority of the proteins either directly  
233 influence actin dynamics (e.g. Arp2/3), are in close proximity to actin patches within the cell, or  
234 utilize actin filaments for their activity (e.g. Myo1).

235 Fig 4. Determination of *in vivo* interaction of occidiofungin. A) Representative samples obtained  
236 following affinity purification of whole cell extracts run on 12% SDS PAGE gels and stained with  
237 Coomassie blue (top) and silver staining (bottom). The Coomassie stained gel was run only until  
238 the proteins entered the separating gel whereas the silver stained gel was allowed to run  
239 completely. The bands in the Coomassie stained gel (demarcated by the arrows) were removed  
240 and used for LC-MS/MS analysis to determine the proteins. Broad range (10-250kDa) protein  
241 ladder was used on both gels; B) Cellular distribution of the proteins obtained in the pull-down  
242 assay following LC-MS/MS analysis.  
243

#### 244 **In vitro analysis of the interaction of occidiofungin with purified actin.**

245 Typical assays for characterizing actin binding natural products are the *in vitro* F-actin  
246 polymerization and depolymerization experiments. However, the addition of occidiofungin was  
247 found to have no effect on the polymerization or depolymerization properties of F-actin (S5  
248 Figure). Therefore, additional studies were required to confirm that actin was the biological target  
249 for occidiofungin. Biotinylation of alkyne-OF following incubation with F- or G-actin and  
250 streptavidin agarose beads was performed to determine whether occidiofungin directly associated  
251 with purified actin *in vitro*. F- or G-actin incubated with the wild type occidiofungin or DMSO  
252 were used as controls for potential non-specific interaction of actin with the agarose beads. The  
253 eluant from the biotinylated alkyne-OF had a single band at approximately 42 kDa, the expected  
254 size for actin. As shown in Fig 5A, the biotinylation of alkyne-OF was required for the co-  
255 purification of F- or G- actin with the streptavidin beads (Lane 5 and 8) as actin was not present in  
256 the control lanes that exposed actin to native OF or the carrier solvent DMSO (lanes 6, 7, 9, and

257 10). In this *in vitro* interaction assay, occidiofungin was shown to directly bind to F- or G-actin.  
258 To further support this observation, a dissociation constant of  $1.0 \pm 0.8 \mu\text{M}$  was determined from  
259 three independent ITC experiments using rabbit skeletal muscle G-actin (Fig 6). The ITC data also  
260 showed a 1:1 binding ratio for occidiofungin to G-actin. The ITC experiments were not adaptable  
261 to observe F-actin binding, so a co-sedimentation assay, which is commonly reported for  
262 identifying actin associated proteins, was performed [51, 52]. Phalloidin was used as a positive  
263 control in the assay (Fig 7). Phalloidin had an estimated dissociation constant ( $K_d$ ) of 8 nM with  
264 a saturation of binding ratio of 0.6 phalloidin to one actin monomer. These values are corroborated  
265 by previous reports [53]. The biggest difference in binding to F-actin between occidiofungin and  
266 phalloidin is the number of molecules bound before saturation. Phalloidin saturated at  
267 approximately one molecule for every two actin monomers, whereas 24 molecules of  
268 occidiofungin were bound to each actin monomer before saturation. Even with the large number  
269 of bound occidiofungin to F-actin, the estimated  $K_d$  value was still  $1.0 \mu\text{M}$ . It is important to note  
270 that the higher  $K_d$  value is attributed to a 50-fold increase in the amount of occidiofungin bound  
271 to actin compared to phalloidin.

272 Confocal microscopy using the fluorophore Acti-stain 670 phalloidin was carried out to  
273 visualize the impact of occidiofungin or alkyne-OF on actin filaments. Microscopic evaluation  
274 found that F-actin was still present but the morphology of F-actin changed in the presence of  
275 occidiofungin in a dose-dependent manner (Fig 5B). Using alkyne-OF labeled with azide  
276 functionalized Alexa Fluor 488 dye, occidiofungin interaction with F-actin was directly observed  
277 (S6 Figure). Similar to that shown using labeled phalloidin, F-actin also appeared to aggregate  
278 following exposure to occidiofungin. Fluorescence visualization of this interaction following  
279 treatment with alkyne-OF and native occidiofungin demonstrated a high degree of aggregation of

280 the filaments which was not observed in the controls. Occidiofungin does not prevent  
281 polymerization or depolymerization of F-actin, but it does bind to F-actin causing it to aggregate.  
282 Given these unique observations for the bioactivity of occidiofungin, additional *in vivo* studies  
283 were conducted to verify that actin is its biological target.

284 Fig 5. *In vitro* interaction of occidiofungin with F- and G-actin. a) Affinity pulldown of actin using  
285 alkyne-OF: Lane 1- Ladder, Lane 2-100 ng pure F-actin, Lane 3-100 ng pure G-actin, Lane 4-  
286 Empty, Lane 5-F-actin treated with alkyne-OF, Lane 6-F-actin treated with native occidiofungin,  
287 Lane 7-F-actin treated with DMSO, Lane 8-G-actin treated with alkyne-OF, Lane 9-G-actin treated  
288 with native occidiofungin, Lane 10-G-actin treated with DMSO; b) Fluorescence microscopy  
289 analysis of the effect of occidiofungin treatment on actin filaments visualized using fluorescently  
290 labeled phalloidin: A: actin filaments treated with solvent blank (DMSO), B: Actin:native  
291 occidiofungin (24  $\mu$ g actin:4  $\mu$ g native occidiofungin), C: Actin:native occidiofungin (24  $\mu$ g  
292 actin:8  $\mu$ g native occidiofungin). Scale bar represents 5 $\mu$ m.

293 Fig 6. Isothermal titration calorimetry is used to measure occidiofungin (OF) binding to actin. A)  
294 Thermogram showing the heat exchange from equal injections of a solution containing OF into  
295 the ITC chamber containing actin. B) A representative binding isotherm of the integrated heat  
296 change from each injection shown in A is fit to a single-ligand binding model to yield an OF-actin  
297 dissociation constant. The mean and standard deviation from three independent experiments are  
298  $K_d = 1.0 \pm 0.8 \mu\text{M}$ .

299 Fig 7. Co-sedimentation assay to demonstrate binding of occidiofungin to actin. A) Binding curve  
300 of phalloidin to actin ( $K_d = 8 \text{ nM}$  and the stoichiometry (ligand : protein) is 0.6:1.0) and B) Binding  
301 curve of occidiofungin to actin ( $K_d = 1 \mu\text{M}$  and the stoichiometry (ligand : protein) is 24:1). The  
302 graph is plotted between amount of free occidiofungin obtained in the supernatant of the co-  
303 sedimentation assay and the amount of bound occidiofungin obtained from the actin pellet. The  
304 data was fit to a standard Langmuir binding isotherm of the form:  $[X]_{\text{bound}} = [X] * S / (K_d + [X])$ ,  
305 where S is the maximal X bound,  $K_d$  is the dissociation constant and X is the concentration of free  
306 ligand.

307

### 308 **In vivo analysis of occidiofungin interactions with actin.**

309 *In vivo* visualization of the localization of occidiofungin was done in intact yeast cells.  
310 Cellular localization of F-actin is well characterized in *S. pombe* and *S. cerevisiae*. Time course  
311 analysis of *S. pombe* following alkyne-OF treatment and derivatization with azide Alexa-488  
312 showed a specific pattern of localization of the compound (Fig 8A). Alkyne-OF was seen to have

313 a faint pattern of staining at the polar tips at 10 minutes post treatment, which subsequently  
314 increased in intensity at 30 minutes post treatment. Strong fluorescence was observed at the polar  
315 ends of the cell and at the septum of dividing cells. A similar assay done using *S. cerevisiae* showed  
316 localization of alkyne-OF at the bud tips at the early time points and staining throughout the parent  
317 cell at later time points (Fig 8B). The unique pattern formed was observed to be a combination of  
318 striated and inclusion-like structures. In both yeast systems, when cells were pre-treated with  
319 native occidiofungin prior to treatment with alkyne-OF, the observed cellular localization patterns  
320 disappeared (Fig 8 A & B, panels D, E, and F) indicating that alkyne-OF and occidiofungin  
321 compete for the same cellular target. The vesicular pattern observed at the later time points of  
322 exposure is indicative of endocytic vesicles that are coated with actin being circulated through the  
323 cell [54, 55]. Actin patches in the cells of *S. pombe* are seen at the cell tips in growing cells and at  
324 the division septum in dividing cells. Actin patches recruited to the division septum interact with  
325 myosin to form the acto-myosin ring which is instrumental in cell division [56]. The time course  
326 analysis in both types of fungal cells show localization of occidiofungin to the regions where actin  
327 is known to be localized.

328 Fig 8. Competition assay of native occidiofungin and alkyne-OF. Time course analysis (A-C) of  
329 alkyne-OF distribution and the distribution of alkyne-OF with the competition of native  
330 occidiofungin (D-F) in a) *Schizosaccharomyces pombe* and b) *Saccharomyces cerevisiae*. Arrows  
331 indicate specific localization patterns of alkyne-OF observed in each cell at 10, 30, and 60 minutes.  
332 When pretreated with native occidiofungin, alkyne-OF does not bind or is restricted to cellular  
333 envelope in *Schizosaccharomyces pombe* and *Saccharomyces cerevisiae*, respectively.

334 To directly determine the effect of occidiofungin on actin organization *in vivo*, fluorescence  
335 microscopy was carried out on diploid cells of *S. cerevisiae* exposed to sub-inhibitory  
336 concentrations of occidiofungin. Within 30 minutes of exposure, an accumulation of actin patches  
337 and/or aggregates of F-actin were observed throughout the treated cells with a concomitant loss of

338 actin cables (Fig 9A and 9B). Actin cables are formed by bundling F-actin. In Figure 8, the  
339 punctate structures in these cells are still likely filamentous actin, but occidiofungin appears to  
340 disrupt the organization of F-actin to form cables at sub-inhibitory concentrations.

341 Fig 9. Effects of occidiofungin exposure on the integrity of actin cables in *S. cerevisiae* cells. A  
342 montage of cells processed for actin visualization using phalloidin-TRITC from: a) a culture  
343 exposed to solvent blank control (DMSO) where actin patches and cables are easily identifiable;  
344 and b) an occidiofungin treated culture (0.5X MIC; for 30 minutes) showing loss of actin cables  
345 and the accumulation of actin aggregates. Scale bars represent 2 $\mu$ m. The arrows are used to  
346 demarcate the presence of actin cables.

347

#### 348 **Efficacy of occidiofungin in treating a murine model of vulvovaginal candidiasis.**

349 Six to eight-week-old BALB/c mice that were intravaginally infected with *C. albicans* were  
350 dosed once per day with occidiofungin for three days. The occidiofungin treated groups were  
351 compared to a vehicle control group. Three groups of six mice were treated with 100, 50, and 0  $\mu$ g  
352 of occidiofungin suspended in 0.3% Noble agar. The occidiofungin treated groups reduced fungal  
353 load by more than two logs (Fig 10). The reduction in fungal load with both treatment groups was  
354 statistically significant from vehicle control ( $p < 0.001$ ). There was no statistically significant  
355 difference between the treated groups ( $p = 0.33$ ), suggesting that the lower limit of occidiofungin  
356 dosing was not achieved in the experiment. During the course of the study, the mice were examined  
357 for outward signs of distress or irritation. No behavioral changes including sluggishness,  
358 stretching, or reluctance to consume food was observed. Furthermore, no vaginal bleeding or  
359 swelling was observed following treatment.

360 Fig 10. Efficacy of occidiofungin in treating murine vulvovaginal candidiasis. The graph  
361 demonstrates CFUs per ml of *Candida albicans* in the control group of mice compared to the  
362 groups treated intravaginally with different concentrations of occidiofungin in 0.3% noble agar.  
363 Error bars represent standard deviation. Statistical analyses indicate a significant difference  
364 between the control group and the treated groups ( $p < 0.001$ ) as indicated by the asterisk.



365

## 366 **Discussion**

367 We have demonstrated that occidiofungin directly interacts with actin causing a disruption  
368 in normal cellular actin-based functions. *In vivo* data in yeast indicates that following treatment,  
369 the compound accumulates in areas rich in actin localization. In addition, disruption of cables  
370 throughout the fungal cells following exposure to sub-inhibitory concentrations of occidiofungin  
371 can be visualized. This interaction with actin can be observed *in vitro* via pulldown assays, ITC  
372 assays, and co-sedimentation studies. These studies establish direct interaction of occidiofungin  
373 with actin with a dissociation constant similar to other well-established actin binding proteins such  
374 as  $\alpha$ -actinin, tropomyosin isoforms, and fimbrin [57-59]. From the binding studies and *in vitro*  
375 microscopy assays, it is evident that occidiofungin likely assembles into a large complex around  
376 F-actin. Based on the ITC study, occidiofungin and G-actin were bound at a 1:1 ratio. The  
377 propensity to form an occidiofungin complex appears to require the presence of F-actin. Formation  
378 of self-assembled complexes has previously been observed in several lipopeptide antibiotics [60].  
379 It is likely that occidiofungin undergoes self-assembly, forming micellar structures at the  
380 concentrations tested in our assay. Additionally, cellular processes that rely on the maintenance of  
381 the actin cytoskeleton such as endocytosis, hyphae formation, and nuclear DNA positioning were  
382 shown to be disrupted with the addition of occidiofungin. We also demonstrate that occidiofungin  
383 is capable of treating a murine vulvovaginal candidiasis infection without any signs of toxicity.  
384 Furthermore, occidiofungin demonstrated efficacy at a concentration that is ten-fold lower than  
385 azole-based treatment methods [61].

386 Given that we have observed fungicidal activity as low as 100 nM concentrations, the  
387 number of bound occidiofungin to F-actin is likely to be a lot lower than 24:1 for its fungicidal



388 activity. We hypothesize that occidiofungin binding to F-actin interferes with the binding of other  
389 actin associated proteins leading to disruption of cellular activities involving actin dynamics.  
390 Cables are necessary for a multitude of cellular functions including hyphal formation (disrupted  
391 following treatment as seen in Figure 2), endocytosis (reduced following treatment as seen in  
392 Figure 3) and proper positioning of the mitotic spindle during cell division (accumulation of  
393 multinucleated cells following treatment as seen in S2 Table). Studies aimed at understanding the  
394 events following the binding of occidiofungin to actin will need to be conducted to determine the  
395 exact connection for inducing apoptosis. Further, the localization pattern observed in the  
396 microscopy studies done in *S. cerevisiae* and *S. pombe* demonstrate the specificity of occidiofungin  
397 to F-actin. If the binding to actin were non-specific, actin would act as a retardant to the efficacy  
398 of occidiofungin due to the sheer number of occidiofungin molecules that are capable of binding  
399 a single F-actin monomer at a Kd value in the range of most actin associated proteins. The co-  
400 sedimentation assays and the localization studies indicate that the primary target of occidiofungin  
401 in the yeast cell is actin.

402 One of the challenges facing the development of antifungals is the fact that uptake of  
403 compounds into fungal cells does not occur as easily as it does in bacteria. Most fungal cells have  
404 a sturdy cell wall made of several glycoproteins that make up almost one-third of the dry weight  
405 of the cell. The efficiency of antifungals relies heavily upon being able to penetrate the cell  
406 envelope [62]. Occidiofungin has the advantage of being taken up by the fungal cell, as evidenced  
407 by the low MICs against several different types of fungi. Susceptibility to occidiofungin can be  
408 seen in pathogenic strains that are resistant to treatment with azoles and echinocandins (S1 Table).  
409 Additionally, occidiofungin has the advantage of inducing cell death in fungi via a mechanism that  
410 differs from the common classes of antifungals used to treat fungal infections.

411           Recent studies have shown that the dynamic nature of actin is necessary to maintain the  
412 cellular functions in which actin is involved such as endocytosis, mitochondrial transport, and  
413 growth [45]. A disturbance in the actin dynamics affects mitochondrial function [63, 64]. Previous  
414 reports suggest that stabilization and aggregation of actin leads to the induction of a Ras-cAMP-  
415 PKA pathway which causes mitochondrial destabilization and production of ROS [65, 66]. We  
416 have demonstrated that occidiofungin can directly interact with actin. Loss of actin cables  
417 following occidiofungin treatment can affect mitochondrial integrity, which in turn triggers a  
418 cascade of events leading to the release of reactive oxygen species. The release of ROS has been  
419 widely reported to be a precursor for the onset of apoptosis in yeast [67]. In addition, caspase  
420 dependent pathways have been theorized to be induced following aggregation of actin filaments  
421 in animal cells and it is possible that a similar pathway takes place involving Yca1p, the caspase  
422 found in yeast [68]. A newly formed bud contains a large pool of actin which coordinate the  
423 retrograde transport of vesicles along the actin cable into the mother cell. Actin nucleation is  
424 carried out by the Arp2/3 complex and a host of proteins including Cap1, Abp1 and Sac6 which  
425 are involved in the actin patch based transport of vesicles [45]. Fluorescence time course assays  
426 done on the cells of *S. cerevisiae* and *S. pombe* support this hypothesis. Furthermore, bud tips in  
427 *S. cerevisiae* are known to be rich in actin patches which are necessary to carry out cellular  
428 functions such as cell division and endocytosis [45]. Occidiofungin was observed to localize to  
429 these cellular areas in the *in vivo* microscopy experiments.

430           Natural products with *in vitro* antifungal properties that target the actin cytoskeleton have  
431 been previously reported [69]. One of the examples of an actin targeting antifungal is  
432 jasplakinolide, a compound that was isolated from sea sponges[70]. Although the compound had  
433 comparable activity against some *Candida* species when compared with miconazole, it had a

434 limited spectrum of activity [70]. Furthermore, jasplakinolide was reported to be severely toxic in  
435 animal systems. It was reported to cause necrosis at the site of a subcutaneous injection at doses  
436 as low as 0.1 mg/kg and led to mortality at 1 mg/kg [71]. It is possible that its high level of toxicity  
437 is associated to the direct inhibition of actin depolymerization or its interaction with other cellular  
438 targets. A newly discovered actin binding antifungal is ginkbilobin [72]. This protein has been  
439 reported to induce programmed cell death following perturbation of the actin cytoskeleton and has  
440 a broader range of activity compared to jasplakinolide, however the effect of the compound in an  
441 animal system has not been reported [73]. Similarly, neosiphoniamolide A, a cyclodepsipeptide  
442 closely related to jasplakinolide, demonstrated a wide spectrum of antifungal activity. However,  
443 its toxicity in an animal system has not yet been reported [74]. Halichondramide, another  
444 antifungal compound isolated from a marine sponge, has been reported to be active against  
445 *Candida* species and *Trichophyton* species. Like jasplakinolide, it was severely toxic following a  
446 subcutaneous administration of 1.4 mg/kg of the compound in a murine system [75]. To date, the  
447 short list of actin binding antifungal compounds is limited by their toxicity in animals at doses that  
448 would be required to demonstrate an efficacious effect.

449 Occidiofungin, on the other hand, is well tolerated at 5 mg/kg or 20 mg/kg when  
450 administered intravenously or subcutaneously, respectively[37, 40]. This dose is much higher than  
451 the MIC of occidiofungin against several fungal pathogens. Furthermore, blood cells and blood  
452 chemistry following administration of occidiofungin show no serious signs of toxicity [40]. The  
453 difference in reported toxicity of occidiofungin to other actin binding compounds may be attributed  
454 to the inability of occidiofungin to disrupt polymerization or depolymerization of actin, different  
455 rates of uptake between yeast and animal cells, or the possible lack of off target binding that could  
456 lead to a toxic response. We have previously shown that occidiofungin is effective against several

457 cancer cell lines [40]. The activity against these cell lines was almost a log more sensitive than the  
458 fibroblast cell line used as a control. It is believed that the growth rates of the cells are attributed  
459 to the differences in killing activity. This was later demonstrated with *S. cerevisiae*, *C. albicans*  
460 and *C. glabrata* strains of yeast grown in nutrient depleted conditions [49]. Further studies need  
461 to be carried out to examine the lack of severe toxicity of occidiofungin to an animal system. The  
462 low toxicity of occidiofungin combined with its wide spectrum of activity and demonstrable *in*  
463 *vivo* efficacy in treating a fungal infection is unprecedented in any actin binding antifungal  
464 compound.

465         Occidiofungin binds to actin and causes aggregation of the F-actin filaments *in vitro* which  
466 may lead to the accumulation of ROS and apoptosis *in vivo*. Demonstration of the effect of the  
467 compound in eliminating a common fungal infection *in vivo* supports the belief that occidiofungin  
468 could constitute a new class of clinically relevant antifungals. The activity of occidiofungin against  
469 echinocandin and azole resistant strains of pathogenic fungi leads us to consider that this  
470 compound would be a valuable addition to the existing antifungals for clinical treatment.  
471 Additional studies with occidiofungin may aid in furthering the understanding of the cellular  
472 events taking place that lead to the accumulation of ROS and apoptosis. A better understanding of  
473 entry and the events that lead to apoptosis following the binding of actin may lead to other  
474 potentially novel therapeutics. Further, future studies aimed at understanding how occidiofungin  
475 crosses the plasma membrane of fungi are warranted. Nevertheless, an actin-targeting antifungal  
476 that has a wide spectrum of activity against clinically pathogenic fungi and minimal toxicity in  
477 animal models could be the novel drug that is needed in the current antifungal arsenal to combat  
478 fungal infections.

479

## 480 **Methods**

### 481 **Spectrum of activity of occidiofungin.**

482 Minimum inhibitory concentration (MIC) susceptibility testing was performed according  
483 to the CLSI M27-A3 and M38-A2 standards for the susceptibility testing of yeasts and filamentous  
484 fungi, respectively. Incubation temperature was 35°C and the inoculum size was  $0.5 - 2.5 \times 10^3$   
485 colony-forming units (CFU)/mL and  $0.4 - 5 \times 10^4$  conidia/mL for yeasts and filamentous fungi,  
486 respectively. Inoculum concentration for dermatophytes was  $1-3 \times 10^3$  conidia/mL. RPMI was used  
487 throughout as the growth medium and *Cryptococcus* strains were tested in YNB. Occidiofungin  
488 MICs were recorded at 50% and 100% growth inhibition after 24 and 48 hours of incubation, with  
489 the exception of dermatophytes which were incubated for 96 hours. Fluconazole MICs against  
490 *Candida* strains were recorded at 50% inhibition after 24 hours and against *Cryptococcus* strains  
491 after 72 hours. Voriconazole MICs were recorded at 100% inhibition after 24 hours for  
492 zygomycetes and after 48 hours for *Fusarium* and *Aspergillus* strains. Voriconazole MICs were  
493 recorded at 80% inhibition after 96 hours of incubation for dermatophytes. *S. cerevisiae* deletion  
494 mutants were obtained from the commercially available BY4741 deletion library (Thermo  
495 Scientific). Susceptibility testing was carried out on inoculum size of  $0.5-1 \times 10^4$  cells/ml in YPD  
496 media at 30°C and MICs recorded after 48 and 60 hours.

### 497 **Hyphal induction.**

498 *Candida albicans* strain ATCC 66027 was grown in YPD at 30°C for 48 hours to reach  
499 saturation with a density of 17-19 OD<sub>600</sub>/ml. Cells were diluted into fresh Spider media (1%  
500 nutrient broth, 1% mannitol, 0.2% K<sub>2</sub>HPO<sub>4</sub>) to obtain 0.05 OD<sub>600</sub>/ml ( $\sim 0.5-1 \times 10^6$  cells/ml) and  
501 incubated at 37°C with shaking to induce hyphae formation[76]. Immediately prior to 37°C  
502 incubation, occidiofungin (1µg/ml; 0.5X MIC) or an equal volume of DMSO was added to

503 cultures. Aliquots were removed at 0, 1, 2, 4, and 6 hour time points, fixed in 3.7% formaldehyde  
504 for later analysis of cell morphology by light microscopy. Over 200 cells were examined for each  
505 time point and cells were scored as having either a yeast or filamentous form with cells showing  
506 any outgrowth as being filamentous.

#### 507 **DNA segregation.**

508 A mid log culture of *S. cerevisiae* (BY4743; diploid) and *C. albicans* (ATCC 66027) were  
509 diluted into fresh YPD to obtain an OD<sub>600</sub>/ml of 0.095 (~1-1.5x10<sup>6</sup> cells/ml) and 0.05 (0.5-0.8x10<sup>6</sup>  
510 cells/ml), respectively. DMSO or occidiofungin (1µg/ml; 0.5X MIC) was added and cultures were  
511 placed at 30°C with shaking. Samples were removed at 0.5, 1, and 2 hours and cells fixed for 1.5  
512 hours at room temperature with the addition of formaldehyde to 3.7%. Cells were washed in PBS  
513 and permeabilized with the addition of an equal volume of PBS containing 0.2% TritonX-100 for  
514 30 minutes at room temperature. Cells were isolated by centrifugation, washed in PBS,  
515 resuspended in a minimal volume of PBS, added to concanavalinA treated glass slide, and overlaid  
516 with VectaShield plus DAPI. Images were viewed using a Nikon 50i fluorescence microscope with  
517 a 100X oil immersion objective and DAPI filter. Cells were scored based on bud morphology and  
518 DNA location.

#### 519 **FM-464 uptake assay for endocytosis.**

520 Three 1 mL aliquots of *S. pombe* at a density of OD<sub>600</sub> 0.6 to 0.8 were treated with 0.01%  
521 DMSO, 0.5 µg/mL (0.5X MIC), or 1 µg/mL (1X MIC) of native occidiofungin for 30 minutes at  
522 30°C. Cells were isolated by centrifugation at 21,000 g for 2 minutes, washed thrice with PBS and  
523 resuspended in YPD containing 8 mM FM-464 (ThermoFisher Scientific). Cells were incubated  
524 in the presence of the dye for 60 minutes at 30°C, followed by two washes with PBS and then

525 added to a microscope slide for visualization. Images were obtained using an Olympus FV1000  
526 confocal microscope with a 40x/0.9 dry objective.

### 527 **Derivatization of occidiofungin.**

528 Occidiofungin was purified from a liquid culture of *Burkholderia contaminans* MS14 as  
529 previously described [36]. Pure occidiofungin was aliquoted into 100 µg fractions and stored in  
530 lyophilized form at 4°C until use. Addition of an alkyne reactive group to the primary amine on  
531 occidiofungin was performed initially at the Texas A&M Natural Products LINCHPIN Laboratory  
532 at Texas A&M University and subsequently at the CPRIT Synthesis and Drug-Lead Discovery  
533 Laboratory at Baylor University.

534 The alkyne derivatization of occidiofungin was carried out under nitrogen atmosphere in a  
535 round bottom flask (S1 Figure) using HPLC grade reagents. A solution of triethylamine and  
536 acetonitrile was prepared by dissolving 10 µL of triethylamine in 11.7 mL of acetonitrile. A stock  
537 solution of acetonitrile and reagents was prepared by adding 2,5-dioxopyrrolidin-1-yl hex-5-  
538 ynoate (1.40 mg, 6.69 µmole, 8.2 equiv.) to 1.08 mL of the triethylamine and acetonitrile solution  
539 prepared above. Occidiofungin (1 mg, 0.82 µmole, 1 equiv.) was added to the stock solution of  
540 acetonitrile and reagents (400 µL) containing triethylamine (0.34 µL, 2.46 µmole, 3 equiv.) and  
541 2,5-dioxopyrrolidin-1-yl hex-5-ynoate (51.6 µg, 2.46 µmole, 3 equiv.). Occidiofungin was added  
542 while stirring, with water (400 µL) added to the mixture as a co-solvent. The resultant mixture was  
543 stirred for three days at 22°C. Purification of alkyne-OF was performed on an Agilent 1200 series  
544 semi-prep HPLC (gradient 5% acetonitrile/water to 95% acetonitrile/water over 20 minutes) using  
545 a Phenomenex Gemini 5µ C18 110A (100 x 21.2 mm) reversed-phase column. For analytical  
546 analysis, a phenomenex Gemini 3µ C18 110A (150 x 4.6 mm) reversed-phase column was used  
547 on an Agilent 1200 series analytical HPLC system. Derivatized occidiofungin was also purified

548 using a 4.6- by 250-mm C18 column (Grace-Vydac; catalog no. 201TP54) on a Bio-Rad BioLogic  
549 F10 Duo Flow with Quad Tec UV-Vis detector system using a similar gradient described above.  
550 Analytical HPLC analysis of the reaction mixture indicated complete consumption of the starting  
551 material and a new peak in the chromatogram (OF RT = 13.6 min; alkyne-OF RT = 15.0 min).  
552 The crude mixture was lyophilized and the crude powder, solubilized in 35% acetonitrile  
553 containing 0.1% trifluoroacetic acid, was purified on a semi-prep HPLC (alkyne-OF RT = 13.0  
554 minutes) column to yield alkyne-OF (0.76 mg, 70%).

555 NMR data were collected using a Bruker Ascend 600 ( $^1\text{H}$  600 MHz and  $^{13}\text{C}$  150 MHz)  
556 NMR spectrometer equipped with a 5 mm cryoprobe. The NMR data for  $^1\text{H}$  NMR chemical shifts  
557 are reported as  $\delta$  values in ppm relative to residual HOD (3.30 ppm), coupling constants ( $J$ ) are  
558 reported in Hertz (Hz), and multiplicity follows convention. Unless otherwise indicated,  
559 dimethylsulfoxide- $d_6$  (DMSO- $d_6$ ) served as an internal standard (40.5 ppm) for the  $^{13}\text{C}$  spectra.  
560 NMR data for alkyne-OF A-D is shown in S2 Figure (A-F) and the assignment of the alkyne  
561 subunit to diaminobutyric acid (DABA5) is shown in S3 Figure (A-H). The assignment of the  
562 alkyne subunit has led to a correction in the previously reported configuration of DABA5<sup>28</sup> and  
563 occidiofungin B is likely identical in structure to Bk-1215[50] isolated by Schmidt et al.  
564 Assignment of the High-resolution mass spectra (HRMS) were run on a Thermo LTQ Orbitrap  
565 mass spectrometer with ESI direct infusion (alkyne-occidiofungin B HRMS (ESI<sup>+</sup>): Calcd. For  
566  $\text{C}_{58}\text{H}_{92}\text{N}_{11}\text{O}_{23}$  ([M+H]<sup>+</sup>), 1310.6360. Found: 1310.6361).

#### 567 **Actin polymerization and depolymerization assays.**

568 The effect of unmodified occidiofungin on actin polymerization and depolymerization was  
569 measured using the Actin Polymerization Biochem Kit (fluorescence format): rabbit skeletal  
570 muscle actin from Cytoskeleton Inc. (Catalog no.: BK003). Occidiofungin was brought up in 1.5%



571  $\beta$ -cyclodextrin in PBS (pH 7.5) at a concentration of 1  $\mu\text{g}/\mu\text{L}$  and 20  $\mu\text{L}$  of this solution was used  
572 per well. The same buffer without occidiofungin was used for buffer control. General Actin buffer  
573 was supplemented with ATP to 0.2mM prior to the start of the experiment as instructed. G-actin  
574 and F-actin stocks were prepared as described in the kit to achieve stock concentrations of 0.4  
575 mg/mL and 1 mg/mL, respectively. Polymerization and depolymerization assays were then carried  
576 out as per the manufacturer's instructions.

### 577 **Alkyne-OF functionality testing.**

578 Stock solutions of unmodified occidiofungin and alkyne derivatized occidiofungin were  
579 made in DMSO at a concentration of 1mg/mL. These stock solutions were utilized in all the assays  
580 described in this manuscript. The activity of the purified alkyne-OF was compared to the native  
581 compound using the CLSI M27-A3 method of determination of the minimum inhibitory  
582 concentration (MIC) against *Saccharomyces cerevisiae* BY4741 and *Schizosaccharomyces pombe*  
583 972h (received from Dr. Susan Forsburg, Department of Biological Sciences, University of  
584 Southern California). Additionally, activity of the alkyne derivatized occidiofungin was tested  
585 against a higher density ( $\text{OD}_{600}/\text{mL}$  0.6 to 0.8) of cells for both yeast. Assays for TUNEL (APO™-  
586 BrdU TUNEL Assay Kit, LifeTechnologies), phosphatidylserine externalization (Annexin-V-  
587 Fluos staining kit, Roche), and ROS detection (Dihydrorhodamine 123, Sigma) were carried out  
588 as previously described[39].

### 589 **Affinity purification of alkyne-OF associated proteins.**

590 One mL of cells from an overnight culture of *S. pombe* grown to an  $\text{OD}_{600}$  of 0.6-0.8. was  
591 incubated with 8  $\mu\text{g}/\text{mL}$  of alkyne-OF for 30 minutes at 30°C. Controls included cells treated with  
592 DMSO and native occidiofungin. An additional sample using cells that were lysed prior to alkyne-  
593 OF treatment was used for comparison (Figure 2A, Lane Post Click). Following exposure, cells

594 were isolated by centrifugation, washed once with PBS and then lysed by probe sonication (30  
595 second sonication followed by 30 second on ice; cycle repeated 5 times). Insoluble material was  
596 removed by centrifugation at 16,000 g for 10 minutes and the supernatant used in a Click-it protein  
597 reaction (Life Technologies) with the alkyne-OF reacted with azide-biotin, as per the  
598 manufacturer's instructions. The reaction was allowed to proceed for 90 minutes at 37°C with  
599 shaking. Unreacted reagents were removed by passage through a Microcon 10 kDa cutoff filter  
600 (Sigma Aldrich) and the concentrated proteins solubilized in 100  $\mu$ L of 100 mM Tris HCl (pH  
601 7.5). Biotinylated proteins were selected using streptavidin agarose beads (ThermoFisher  
602 Scientific) with incubation at 37°C for 90 minutes. Beads were washed with 10 mL of 100 mM  
603 Tris HCl (pH 7.5) and bound proteins extracted with boiling in 50  $\mu$ L of 1X SDS sample loading  
604 buffer for 15 minutes. The resulting protein sample was loaded onto a 12% SDS gel and  
605 electrophoresis was carried out until the bromophenol blue dye was ~1cm into the separating gel.  
606 The resulting band was excised, trypsin digested by the Protein Chemistry Laboratory (Texas  
607 A&M University), and the subsequent LC-MS/MS analysis performed by the Mass Spectrometry  
608 Laboratory at the University of Texas Health Science Center (San Antonio). Results were analyzed  
609 using the Scaffold software.

#### 610 **Intracellular localization of alkyne-OF.**

611 Colonies from a freshly streaked plate were used to inoculate an overnight culture of *S.*  
612 *pombe* or *S. cerevisiae*. 1 mL of cells from a culture with an OD<sub>600</sub> of 0.6 to 0.8 was incubated  
613 with MIC quantities of alkyne-OF at 30°C with 200  $\mu$ L samples removed at 10, 30, and 60 minute  
614 post incubation. Cells were isolated by centrifugation, washed once in phosphate buffered saline  
615 (PBS), and fixed for 15 minutes at room temperature with the addition of formaldehyde to 3.7%  
616 (in PBS). Cells were permeabilized at room temperature for 20 minutes with the addition of 0.5%

617 TritonX-100 (in PBS). Cells were washed twice with 1 mL of PBS each. Click reaction with azide  
618 derivatized Alexa-488 was carried out according to the manufacturer's protocol (Click-iT EdU  
619 Imaging kit, ThermoFisher Scientific). Cells were washed with PBS and added to a microscope  
620 slide for visualization using an Olympus FV1000 confocal microscope with a 100x/1.4 oil  
621 immersion objective and 40x/0.9 dry objective. A competition assay was carried out by pre-  
622 treating cells with an MIC amount (0.5 µg/mL) of the native occidiofungin followed by treatment  
623 with alkyne-OF.

#### 624 **In vitro actin binding.**

625 Purified rabbit skeletal muscle filamentous actin (Catalog: AKF99) and G-actin (Catalog:  
626 AKL95) was purchased from Cytoskeleton Inc. Actin was reconstituted in Milli-Q water to  
627 achieve a stock concentration of 0.4 mg/mL in a buffer that consisted of 5 mM Tris-HCl (pH 8.0),  
628 0.2 mM CaCl<sub>2</sub>, 0.2 mM ATP, 2 mM MgCl<sub>2</sub>, and 5% (w/v) sucrose as directed by the supplier. This  
629 solution was stored at -80°C in 50 µL aliquots until use. Immediately before use, each aliquot was  
630 thawed by placing in a 37°C water bath for 5 minutes followed by room temperature. For all  
631 studies, 24 µg of F- or G-actin was used with 8 µg alkyne-OF.

632 For biochemical-based studies, click chemistry was performed on this mixture to react the  
633 alkyne-OF with azide-biotin for 90 minutes as described (Click-iT protein reaction buffer kit,  
634 ThermoFisher Scientific). Unreacted reagents were removed by centrifugation (20 minutes at  
635 15,000x g) through a 10 kDa cutoff filter. Proteins retained in the filter chamber were solubilized  
636 in 200 µL of 100 mM Tris-HCl (pH 7.5) and reacted with streptavidin beads as described above.  
637 The beads were washed multiple times using 100 mM Tris HCl (pH 7.5) and bound proteins eluted  
638 by boiling in 50 µL of SDS sample loading buffer. The sample was electrophoresed through a 12%  
639 SDS gel and protein bands visualized by silver staining according to the manufacturer's protocol

640 (Pierce Silver stain kit, ThermoFisher Scientific). F- and G-Actin treated with DMSO and native  
641 occidiofungin were used as controls.

642 For microscopy-based studies, click chemistry was performed to react the alkyne-OF with  
643 functionalized Alexa Fluor 488 according to the manufacturer's instructions (Click-iT EdU  
644 Imaging kit, ThermoFisher Scientific). Unbound dye was removed by overnight dialysis at 4°C  
645 against actin polymerization buffer using a 1 kDa cutoff membrane (Catalog no.: BSA02,  
646 Cytoskeleton Inc.). Actin filaments were removed, added to a slide and analyzed using an Olympus  
647 FV1000 confocal microscope 40x/0.90 dry objective and a 100x/1.4 oil immersion objective. As  
648 a control, 140 nM Acti-stain 670 phalloidin (Cytoskeleton Inc.) was used to visualize actin  
649 filaments as per manufacturer's instructions.

650 F-actin filaments were reacted with native occidiofungin for 15 minutes at room  
651 temperature at molar ratios of 1:10 (24 µg actin:8 µg native occidiofungin) and 1:5 (24 µg actin:4  
652 µg native occidiofungin). The respective mixtures were then stained with 140 nM Acti-stain 670  
653 phalloidin for an additional 15 minutes at room temperature. Stained filaments were added to a  
654 glass slide and observed on an Olympus FV1000 confocal microscope using a 100x/1.4 oil  
655 immersion objective. Actin filaments treated with DMSO (solvent blank negative control) were  
656 stained and observed for comparison.

### 657 **Isothermal Titration Calorimetry.**

658 Rabbit skeletal muscle actin (Cytoskeleton, Inc.) was re-constituted as described above.  
659 Aliquots of actin were thawed and incubated for 1 hour in ITC buffer which contained General  
660 Actin Buffer (Cytoskeleton, Inc.: 5 mM Tris-HCl, pH 8.0, 0.2 mM CaCl<sub>2</sub>) plus 0.5 mM DTT, 0.2  
661 mM ATP and 5% DMSO. Lyophilized OF was re-suspended in ITC buffer to yield a 300µM  
662 concentration. The ITC chamber was loaded with 30 µM G-actin and the syringe with 300 µM OF.

663 A MicroCal iTC200 (Malvern Instruments, Spectris plc) was used to obtain OF binding to actin at  
664 25°C. A 0.3 µL injection was followed by 13 injections of 3 µL while stirring at 1,000 rpm. The  
665 integrated heat from each injection was fit to a one-site binding model using Origin.

666 **Co-sedimentation studies.**

667 Reaction buffer for F-actin binding study consisted of 5 mM Tris-HCl (pH 8.0), 0.2 mM  
668 ATP, and 2 mM MgCl<sub>2</sub>. Samples were prepared in 100 µL volume and the final concentration of  
669 F-actin was 200 nM. Occidiofungin was added to the reaction at concentrations from 25 to 25600  
670 nM. Phalloidin was added to the reaction at concentrations from 25 to 800 nM. Samples were  
671 incubated at room temperature for 30 minutes in thick-wall polycarbonate tubes (#349622,  
672 Beckman Coulter, CA). After incubation, samples were centrifuged at 100,000 rpm, 4°C, for 20  
673 minutes to pellet F-actin (Beckman TL-100 ultracentrifuge). Both supernatant and pellet were  
674 extracted with 200 µL solvent consisting of a combination of 70% acetonitrile (ACN) containing  
675 0.1% trifluoroacetic acid (TFA) and 30% methanol containing 0.4% formic acid. The extracted  
676 sample was centrifuged at 15,000 g for 10 minutes, after which the supernatant was transferred to  
677 a clean centrifuge tube before being freeze dried in a SpeedVac (Labconco, Cat#7810010). The  
678 dried sample was brought up to 100 µL with 50% ACN with 0.1%TFA containing 1 µg/mL  
679 concentration of the internal standard and analyzed on LC-MS. An analog of occidiofungin served  
680 as the internal standard of native occidiofungin, while native occidiofungin served as the internal  
681 standard of phalloidin. All experiments were done in duplicate. An Agilent 1200 front end  
682 chromatography system and a TSQ Quantum™ Access Triple Quadrupole Mass Spectrometer  
683 were used to analyze the samples. Following a 10 µL injection, samples from binding study with  
684 occidiofungin were separated using a 15-minute water/ACN (containing 0.2% formic acid)  
685 gradient starting from 95% to 40% water on a C18 column (SinoChrom ODS-BP 5µm, 2.1 mm x

686 50 mm). The mass spectrometer was operated in positive mode and operated using a protocol  
687 optimized for phalloidin and occidiofungin. Briefly, occidiofungin was monitored in SRM mode  
688 with a scan width (m/z) of 0.3 and a collision energy of 31 eV, while phalloidin was monitored in  
689 SIM mode with a scan width of 0.7. The parent and product mass of native occidiofungin were  
690 1216.7 and 1084.7 Da, respectively. The center mass of phalloidin was 789.87 Da. Area of each  
691 compound was measured through manual integration using Xcalibur™ Software (Thermo Fisher  
692 Scientific). The standard curves were generated for each compound following the extraction  
693 procedure described above. The R<sup>2</sup> values for each standard curve exceeded 0.99.

#### 694 **Rhodamine-Phalloidin staining of actin *in vivo*.**

695 A mid log culture of *S. cerevisiae* (diploid; BY4743) was diluted into fresh YPD to obtain  
696 0.095 OD<sub>600</sub>/ml (~1-1.5x10<sup>6</sup> cells/ml) and occidiofungin (1μg/ml; 0.5X MIC) or an equal volume  
697 of DMSO was added. Cultures were placed at 30°C with shaking for 0.5 or 2 hours. Formaldehyde  
698 (3.7% final) was added directly to the culture and cells incubated for 1.5 hours at room  
699 temperature. Formaldehyde was removed by vacuum filtration through 0.2μm nitrocellulose  
700 followed by several PBS washes. Cells were resuspended in PBS and permeabilized with the  
701 addition of an equal volume of 0.2% Triton X-100 PBS solution. Phalloidin-  
702 Tetramethylrhodamine B isothiocyanate (3.3mM in 100% DMSO; Sigma) was added to 6.6μM  
703 and cells stained for 30 minutes at room temperature. Unbound phalloidin-TRITC was removed  
704 by centrifugation at 8,000 g for 8 minutes at 20°C, the cells resuspended in PBS and added to  
705 concanavalinA treated glass slide and overlaid with VectaShield plus DAPI. Images were viewed  
706 using a Nikon 50i fluorescence microscope with a 100x oil immersion objective and Texas-Red  
707 and DAPI filter sets. Random images were captured using a Retiga EXi Black and White CCD

708 Camera and Image Q software. All images were captured using the same exposure settings with  
709 image contrast altered post capture using CorelDraw.

### 710 **Efficacy studies using occidiofungin.**

711 The murine model of vulvovaginal candidiasis has been widely reported[77]. A variation  
712 of the method described was followed. Three groups of six mice were used to evaluate two  
713 concentrations of occidiofungin (100 µg and 50 µg) and vehicle control (0.3% Noble agar). Briefly,  
714 six to eight-week-old BALB/c mice were treated subcutaneously with 200 ng per mouse of β-  
715 Estradiol 17-valerate three days prior to inoculation with *C. albicans* (D-3). A subcutaneous dose  
716 of estradiol was administered every three days (D0, D3) until the end of the experiment to induce  
717 pseudo-estrus. Approximately a 20 µL intravaginal inoculation of a 2.5x10<sup>6</sup> colony forming units  
718 (CFU)/mL of *C. albicans* defines day zero (D0) of the VVC study. On the same day of inoculation  
719 (D0), another subcutaneous injection of estradiol was made. Lyophilized powder of occidiofungin  
720 containing either 100 µg or 50 µg of occidiofungin was suspended in 20 µL of warm 0.3% Noble  
721 agar before intravaginal inoculation. Drug treatment was done on day 2 (D2), day 3 (D3) and day  
722 4 (D4) of the study. On day 5 (D5), the vaginal lumen was lavaged with 100 µL of sterile PBS  
723 with a 200 µL pipette tip. Serial dilutions and total colony forming units per vaginal lavage were  
724 determined by plating on YPD plates containing 50 µg/mL of chloramphenicol. The colony  
725 forming units (CFUs) obtained from each lavage were counted on plates containing 30-300  
726 colonies for determining the CFU/mL estimates. Body weight, signs of vaginal irritation such as  
727 swelling or bleeding and clinical signs of discomfort (stereotypical stretching behavior) were  
728 monitored. Statistical analyses (T-test) were done to compare the control group to treated groups  
729 and to compare differences between treated groups. All the analyses were 2-sided, with P < .05  
730 considered statistically significant.

731 **Ethics Statement.**

732           Research Compliance's Animal Welfare Office (AWO) supports Texas A&M's  
733 Institutional Animal Care and Use Committees (IACUC), through which all faculty, staff, and  
734 students using animals, regardless of location or funding, must obtain approval before activities  
735 begin. The committee approved the study titled “Determination of efficacy of occidiofungin in the  
736 treatment of vulvo-vaginal candidiasis (IACUC number: IACUC 2017-0164)”. The specific  
737 national guidelines followed by Texas A&M’s AAALAC accredited animal facilities are the  
738 USDA animal welfare assurance regulations (Texas A&M registration: 74-R0012) and PHS NIH  
739 Guidelines (Texas A&M registration: A3893-01).

740

741 **Acknowledgements**

742 We would like to acknowledge Joseph Sorg and Kathryn Ryan in the Biology Department at  
743 Texas A&M University for their erudite discussions. We would also like to thank Lawrence  
744 Dangott for his assistance with the pulldown assays. We also thank Dr. Susan Forsburg for  
745 providing the *Schizosaccharomyces pombe* 972h- strain.

746

747

748

749



## 750 **References**

- 751 1. Control, C. f. D. *Candida auris* Clinical Update - September 2017.
- 752 2. Berkow EL & Lockhart SR. Fluconazole resistance in *Candida* species: a current perspective.  
753 *Inf and Drug Resis.* 2017; 10: 237-245.
- 754 3. Whaley S, Berkow EL, Rybak JM, Nishimoto AT, Barker KS, Rogers D. Azole antifungal  
755 resistance in *Candida albicans* and emerging non-albicans *Candida* species. *Front Microbiol.*  
756 2016; 7: 2173.
- 757 4. Perlin DS. Echinocandin Resistance in *Candida*. *Clin Infect Dis.* 2015; 61: S612-S617.
- 758 5. Matheson A & Mazza D. Recurrent vulvovaginal candidiasis: A review of guideline  
759 recommendations. *Aust N Z J Obstet Gynaecol.* 2017;57(2):139-145.
- 760 6. Sheary B & Dayan L. Recurrent vulvovaginal candidiasis. *Aust Fam Physician.* 2005;  
761 34(3):147-50.
- 762 7. Sobel JD. Pathogenesis and treatment of recurrent vulvovaginal candidiasis. *Clin Infect Dis.*  
763 1992;14 Suppl 1:S148-53.
- 764 8. Ramsay S, Astill N, Shankland G & Winter A. Practical management of recurrent vulvovaginal  
765 candidiasis. *Trends Urol Gynaec Sexual Health.* 2009; 14: 18-22.
- 766 9. Gonçalves B, Ferreira C, Alves CT, Henriques M, Azeredo J, Silva S. Vulvovaginal candidiasis:  
767 Epidemiology, microbiology and risk factors. *Crit Rev Microbiol.* 2016;42(6):905-27.
- 768 10. Watson C & Calabretto H. Comprehensive review of conventional and non-conventional  
769 methods of management of recurrent vulvovaginal candidiasis. *Aust N Z J Obstet Gynaecol.*  
770 2007;47(4):262-72.
- 771 11. Charlier C, Hart E, Lefort A, Ribaud P, Dromer F, Denning DW, Lortholary O. Fluconazole  
772 for the management of invasive candidiasis: where do we stand after 15 years? *J Antimicrob*  
773 *Chemother.* 2006;57(3):384-410.
- 774 12. Hibberd PL & Rubin RH. Clinical aspects of fungal infection in organ transplant recipients.  
775 *Clin Infect Dis.* 1994;19 Suppl 1:S33-40.
- 776 13. Schaenman JM, Rosso F, Austin JM, Baron EJ, Gamberg P, Miller J, Oyer PE, Robbins RC,  
777 Montoya JG. Trends in invasive disease due to *Candida* species following heart and lung  
778 transplantation. *Transpl Infect Dis.* 2009;11(2):112-21.
- 779 14. Dauber JH, Paradis IL & Dummer JS. Infectious complications in pulmonary allograft  
780 recipients. *Clin Chest Med.* 1990;11(2):291-308.

- 781 15. Dummer JS, Montero CG, Griffith BP, Hardesty RL, Paradis IL, Ho M. Infections in heart-  
782 lung transplant recipients. *Transplantation*. 1986; 41: 725-729.
- 783 16. Kanj SS, Welty-Wolf K, Madden J, Tapson V, Baz MA, Davis RD, Perfect JR. Fungal  
784 infections in lung and heart-lung transplant recipients. Report of 9 cases and review of the  
785 literature. *Medicine (Baltimore)*. 1996;75(3):142-56.
- 786 17. Kubak BM. Fungal infection in lung transplantation. *Transpl Infect Dis*. 2002;4 Suppl 3:24-  
787 31.
- 788 18. Montoya JG, Giraldo LF, Efron B, Stinson EB, Gamberg P, Hunt S, Giannetti N, Miller J,  
789 Remington JS. Infectious complications among 620 consecutive heart transplant patients at  
790 Stanford University Medical Center. *Clin Infect Dis*. 2001;33(5):629-40.
- 791 19. Cuenca-Estrella M, Rodriguez D, Almirante B, Morgan J, Planes AM, Almela M, Mensa J,  
792 Sanchez F, Ayats J, Gimenez M, Salvado M, Warnock DW, Pahissa A, Rodriguez-Tudela JL.  
793 In vitro susceptibilities of bloodstream isolates of *Candida* species to six antifungal agents:  
794 results from a population-based active surveillance programme, Barcelona, Spain, 2002-2003.  
795 *J Antimicrob Chemother*. 2005;55(2):194-9.
- 796 20. Edmond MB, Wallace SE, McClish DK, Pfaller MA, Jones RN, Wenzel RP. Nosocomial  
797 bloodstream infections in United States hospitals: a three-year analysis. *Clin Infect Dis*.  
798 1999;29(2):239-44.
- 799 21. Jeffery-Smith A, Taori SK, Schelenz S, Jeffery K, Johnson EM, Borman A. *Candida auris*  
800 Incident Management Team, Manuel R6, Brown CS1 *Candida auris*: a Review of the  
801 Literature. *Clin Microbiol Rev*. 2017; 15;31(1).
- 802 22. McCarthy M. Hospital transmitted *Candida auris* infections confirmed in the US. *BMJ*  
803 (Clinical Research Ed.). 2016; 355: i5978-i5978.
- 804 23. Messer SA, Jones RN, Fritsche TR. International surveillance of *Candida* spp. and *Aspergillus*  
805 spp.: report from the SENTRY Antimicrobial Surveillance Program (2003). *J Clin Microbiol*.  
806 2006; 44(5): 1782–1787.
- 807 24. Sheehan DJ, Hitchcock CA, Sibley CM. Current and emerging azole antifungal agents. *Clin*  
808 *Microbiol Rev*. 1999; 12(1): 40–79.
- 809 25. Sugar AM. The polyene macrolide antifungal drugs. *Antimicrobial Agents* vol 1. pp 229-244  
810 (1986).
- 811 26. Graybill JR. The echinocandins, first novel class of antifungals in two decades: will they live  
812 up to their promise? *Int J Clin Pract*. 2001;55(9):633-8.

- 813 27. Hector RF. Compounds active against cell walls of medically important fungi. *Clin Microbiol*  
814 *Rev.* 1993;6(1):1-21.
- 815 28. Joseph-Horne T & Hollomon DW. Molecular mechanisms of azole resistance in fungi. *FEMS*  
816 *Microbiol Lett.* 1997;149(2):141-9.
- 817 29. Rosana Y, Yasmon A & Lestari DC. Overexpression and mutation as a genetic mechanism of  
818 fluconazole resistance in *Candida albicans* isolated from human immunodeficiency virus  
819 patients in Indonesia. *Journal med microbiol.* 2015; 64: 1046-1052.
- 820 30. Sanguinetti M, Posteraro B, Fiori B, Ranno S, Torelli R, Fadda G. Mechanisms of azole  
821 resistance in clinical isolates of *Candida glabrata* collected during a hospital survey of  
822 antifungal resistance. *Antimicrob Agents Chemother.* 2005;49(2):668-79.
- 823 31. Kurtz MB, Douglas CM. Lipopeptide inhibitors of fungal glucan synthase. *J Med Vet Mycol.*  
824 1997;35(2):79-86.
- 825 32. Ghannoum MA, Rice LB. Antifungal Agents: Mode of Action, Mechanisms of Resistance,  
826 and Correlation of These Mechanisms with Bacterial Resistance. *Clin microbiol rev.* 1999;12:  
827 501-517.
- 828 33. Ashley ESD, Lewis R, Lewis JS, Martin C, Andes D. Pharmacology of Systemic Antifungal  
829 Agents. *Clin Infect Dis.* 2011; 43: S28-S39.
- 830 34. Lewis RE. Current Concepts in Antifungal Pharmacology. *Mayo Clinic Proc.* 2011; 86: 805-  
831 817.
- 832 35. Denning DW, Bromley MJ. Infectious Disease: How to bolster the antifungal pipeline.  
833 *Science.* 2015; 347: 1414-1416.
- 834 36. Lu SE, Novak J, Austin FW, Gu G, Ellis D, Kirk M, Wilson-Stanford S, Tonelli M, Smith L.  
835 Occidiofungin, a Unique Antifungal Glycopeptide Produced by a Strain of *Burkholderia*  
836 *contaminans*. *Biochemistry.* 2009; 48: 8312-8321.
- 837 37. Tan W, Cooley J, Austin F, Lu SE, Pruett SB, Smith L. Nonclinical toxicological evaluation  
838 of occidiofungin, a unique glycolipopeptide antifungal. *Int J Toxicol.* 2012;31(4):326-36.
- 839 38. Ellis D, Gosai J, Emrick C, Heintz R, Romans L, Gordon D, et al. Occidiofungin's chemical  
840 stability and in vitro potency against *Candida* species. *Antimicrob Agents Chemother.*  
841 2012;56(2):765-9.
- 842 39. Emrick D, Ravichandran A, Gosai J, Lu S, Gordon DM, Smith L. The antifungal occidiofungin  
843 triggers an apoptotic mechanism of cell death in yeast. *J Nat Prod.* 2013;76(5):829-38.

- 844 40. Lai Hing S, Ravichandran A, Escano J, Cooley J, Austin F, Lu S, Pruett S, Smith L.  
845 Toxicological Evaluation of Occidiofungin against Mice and Human Cancer Cell Lines.  
846 Pharmacology & Pharmacy. 2014; 5: 1085-1093.
- 847 41. Mayer FL, Wilson D, Hube B. *Candida albicans* pathogenicity mechanisms. Virulence.  
848 2013;4(2):119-28.
- 849 42. Vicker MG. Eukaryotic cell locomotion depends on the propagation of self-organized reaction-  
850 diffusion waves and oscillations of actin filament assembly. Exp Cell Res. 2002;275(1):54-66.
- 851 43. Shareck J & Belhumeur P. Modulation of Morphogenesis in *Candida albicans* by Various  
852 Small Molecules. Eukaryot Cell. 2011;10(8):1004-12.
- 853 44. Smethurst DJ, Dawes IW, Gourelay CW. Actin – a biosensor that determines cell fate in yeasts.  
854 FEMS Yeast Res. 2014; 14: 89-95.
- 855 45. Moseley JB, Goode BL. The Yeast Actin Cytoskeleton: from Cellular Function to Biochemical  
856 Mechanism. Microbiol Mol Biol Rev. 2006 Sep;70(3):605-45.
- 857 46. Hermann GJ, King EJ, Shaw JM. The yeast gene, MDM20, is necessary for mitochondrial  
858 inheritance and organization of the actin cytoskeleton. J Cell Biol. 1997;137(1):141-53.
- 859 47. Kopecká M, Gabriel M. The aberrant positioning of nuclei and the microtubular cytoskeleton  
860 in *Saccharomyces cerevisiae* due to improper actin function. Microbiol. (Reading, England).  
861 1998;144 (Pt 7):1783-97.
- 862 48. Liu HP, Bretscher A. Disruption of the single tropomyosin gene in yeast results in the  
863 disappearance of actin cables from the cytoskeleton. Cell. 1989;57(2):233-42. PubMed PMID:  
864 2649250.
- 865 49. Robinson CA, Denison C, Burkenstock A, Nutter C, Gordon DM. Cellular conditions that  
866 modulate the fungicidal activity of occidiofungin. J Appl Microbiol. 2017;123(2):380-91.
- 867 50. Lin Z, Falkinham JO 3rd, Tawfik KA, Jeffs P, Bray B, Dubay G, Cox JE, Schmidt EW.  
868 Burkholdines from *Burkholderia ambifaria*: antifungal agents and possible virulence factors.  
869 J Nat Prod. 2012;75(9):1518-23.
- 870 51. Heier JA, Dickinson DJ, Kwiatkowski AV. Measuring Protein Binding to F-actin by Co-  
871 sedimentation. J Vis Exper. 2017;(123).
- 872 52. Srivastava J, Barber D. Actin co-sedimentation assay; for the analysis of protein binding to F-  
873 actin. J Vis Exper. 2008;(13).
- 874 53. De La Cruz EM, Pollard TD. Kinetics and thermodynamics of phalloidin binding to actin  
875 filaments from three divergent species. Biochemistry. 1996;35(45):14054-61.

- 876 54. Waddle JA, Karpova TS, Waterston RH, Cooper JA. Movement of cortical actin patches in  
877 yeast. *J Cell Biol.* 1996;132(5):861-70.
- 878 55. Goode BL, Eskin JA, Wendland B. Actin and Endocytosis in Budding Yeast. *Genetics.* 2015;  
879 199: 315-358.
- 880 56. Pelham RJ & Chang F. Actin dynamics in the contractile ring during cytokinesis in fission  
881 yeast. *Nature.* 2002; 419: 82-86.
- 882 57. Janco M, Bonello TT, Byun A, Coster ACF, Lebhar H, Dedova I, Gunning PW, Böcking T.  
883 The impact of tropomyosins on actin filament assembly is isoform specific. *Bioarchitecture.*  
884 2016;6(4):61-75.
- 885 58. Skau CT, Courson DS, Bestul AJ, Winkelman JD, Rock RS, Sirotkin V, et al. Actin filament  
886 bundling by fimbrin is important for endocytosis, cytokinesis, and polarization in fission yeast.  
887 *J Biol Chem.* 2011;286(30):26964-77.
- 888 59. Xu J, Wirtz D, Pollard TD. Dynamic cross-linking by alpha-actinin determines the mechanical  
889 properties of actin filament networks. *J Biol Chem.* 1998;273(16):9570-6.
- 890 60. Hamley IW. Lipopeptides: from self-assembly to bioactivity. *Chemical Comm.*  
891 2015;51(41):8574-83.
- 892 61. González GM, Portillo OJ, Uscanga GI, Andrade SE, Robledo M, Rodríguez C, Elizondo M.  
893 Therapeutic efficacy of voriconazole against a fluconazole-resistant *Candida albicans* isolate  
894 in a vaginal model. *J Antimicrob Chemother.* 2009;64(3):571-3
- 895 62. Tada R, Latge JP, Aimaganianda V. Undressing the fungal cell wall/cell membrane--the  
896 antifungal drug targets. *Curr Pharm Des.* 2013;19(20):3738-47.
- 897 63. Okamoto K, Shaw JM. Mitochondrial morphology and dynamics in yeast and multicellular  
898 eukaryotes. *Annu Rev Genet.* 2005;39:503-36.
- 899 64. Higuchi R, Vevea JD, Swayne TC, Chojnowski R, Hill V, Boldogh IR, Pon LA. Actin  
900 dynamics affects mitochondrial quality control and aging in budding yeast. *Curr Biol.*  
901 2013;23(23):2417-22
- 902 65. Wolyniak MJ, Sundstrom P. Role of Actin Cytoskeletal Dynamics in Activation of the Cyclic  
903 AMP Pathway and HWP1 Gene Expression in *Candida albicans*. *Eukaryot Cell.*  
904 2007;6(10):1824-40
- 905 66. Wang C, Zhou GL, Vedantam S, Li P, Field J. Mitochondrial shuttling of CAP1 promotes  
906 actin- and cofilin-dependent apoptosis. *J Cell Sci.* 2008;121(Pt 17):2913-20.

- 907 67. Zorov DB, Juhaszova M, Sollott SJ. Mitochondrial Reactive Oxygen Species (ROS) and ROS-  
908 Induced ROS Release. *Physiol Rev.* 2014;94(3):909-50.
- 909 68. Desouza M, Gunning PW, Stehn JR. The actin cytoskeleton as a sensor and mediator of  
910 apoptosis. *Bioarchitecture.* 2012; 2: 75-87.
- 911 69. Allingham JS, Klenchin VA, Rayment I. Actin-targeting natural products: structures,  
912 properties and mechanisms of action. *Cell Mol Life Sci.* 2006;63(18):2119-34
- 913 70. Bubb MR, Senderowicz AM, Sausville EA, Duncan KL, Korn ED. Jasplakinolide, a cytotoxic  
914 natural product, induces actin polymerization and competitively inhibits the binding of  
915 phalloidin to F-actin. *J Biol Chem.* 1994;269(21):14869-71.
- 916 71. Scott VR, Boehme R, Matthews TR. New Class of Antifungal Agents: Jasplakinolide, a  
917 Cyclodepsipeptide from the Marine Sponge, *Jaspis* Species. *Antimicrob Agents Chemother.*  
918 1988;32(8):1154-7
- 919 72. Gao N, Wadhvani P, Mühlhäuser P, Liu Q, Riemann M, Ulrich AS, Nick P. An antifungal  
920 protein from *Ginkgo biloba* binds actin and can trigger cell death. *Protoplasma.* 2016; 253:  
921 1159-1174.
- 922 73. Wang H, Ng TB. Ginkbilobin, a novel antifungal protein from *Ginkgo biloba* seeds with  
923 sequence similarity to embryo-abundant protein. *Biochem Biophys Res Commun.*  
924 2000;279(2):407-11
- 925 74. D'Auria MV, Gomez Paloma L, Minale L, Zampella A, Debitus C, Perez J. Neosiphoniamolide  
926 A, a novel cyclodepsipeptide, with antifungal activity from the marine sponge *Neosiphonia*  
927 *superstes*. *J Nat Prod.* 1995;58(1):121-3.
- 928 75. Kernan MR, Faulkner DJ. Halichondramide, an antifungal macrolide from the sponge  
929 *Halichondria* sp. *Tetrahedron Letters.* 1987;28: 2809-2812.
- 930 76. Liu H, Kohler J, Fink GR. Suppression of hyphal formation in *Candida albicans* by mutation  
931 of a STE12 homolog. *Science.* 1994; 266: 1723-1726.
- 932 77. Yano J, Fidel JPL. Protocols for vaginal inoculation and sample collection in the experimental  
933 mouse model of *Candida vaginitis*. *J Vis Exp.* 2011;(58).

934

935



## 936 **Supporting Information**

937 S1 Table: Activity of occidiofungin against filamentous and non-filamentous fungi.

938 S2 Table: Occidiofungin exposure results in nuclear segregation defects in mitotic cultures of *S.*  
939 *cerevisiae* and *C. albicans*. Nuclear DNA was scored by DAPI staining of fixed cells treated with  
940 0.5X MIC occidiofungin for 0.5, 1, and 2 hours at 30°C. Cells were binned into one of four  
941 categories based on bud morphology and DNA localization and the percentage of cells in each  
942 category are reported. Approximately 200 cells were scored for each time point and data from two  
943 separate experiments are shown.

944 S3 Table: Activity of occidiofungin against *S. cerevisiae* mutants deleted for genes linked to actin  
945 polymerization and depolymerization.

946 S4 Table: Activity of alkyne-OF compared to native occidiofungin

947 S5 Table: List of proteins pulled down exclusively by alkyne-OF using the affinity purification.  
948 Proteins in the cells highlighted in green are those that were found in the pulldown assays in both  
949 *S.pombe* and *S.cerevisiae*. Proteins in the cells that are not highlighted were found in the *S.pombe*  
950 assays only.

951

952 S1 Figure: Scheme of chemical addition of alkyne group to occidiofungin B and mass  
953 determination of alkyne-OF B.

954 S2 Figure: NMR data for Alkyne-occidiofungin A-D (<sup>1</sup>H 600 MHz and <sup>13</sup>C 150 MHz in DMSO-  
955 d6) A) <sup>1</sup>H NMR, B) COSY 2D NMR, C) TOCSY 2D NMR, D) HSQC 2D NMR, E) HMBC 2D  
956 NMR, and F) NOESY 2D NMR.

957 S3 Figure: Assignment of alkyne subunit and revised structure of diaminobutyric acid in the cyclic  
958 peptide. A) Expanded 1H NMR, B) Expanded TOCSY, C) Expanded HSQC, D) Expanded  
959 HMBC, E) Further expansion of HMBC, F) Expanded COSY NMR, G) Expanded TOCSY NMR,  
960 and H) Carbon and proton assignments of alkyne subunit.

961 S4 Figure: Induction of apoptosis by alkyne-OF: The ‘DMSO’ and ‘H<sub>2</sub>O<sub>2</sub>’ columns represent the  
962 negative and positive controls, respectively. The ‘WT’ column corresponds to cells treated with  
963 1x MIC quantity of native occidiofungin and the last two panels represent treatment of cells with  
964 alkyne-OF at the concentration indicated. A) Externalization of phosphatidylserine demonstrated  
965 by the fluorescence of Annexin-V-Fluorescein, B) Release of reactive oxygen species indicated  
966 by the formation of rhodamine from dihydrorhodamine 123 and C) Double stranded breaks  
967 visualized by TUNEL assay, following treatment with native and alkyne-OF.

968 S5 Figure: Effect of occidiofungin on actin (a) polymerization and (b) depolymerization *in vitro*.  
969 Symbols are as follows: ◆ - G-buffer (control), ■ - G-buffer and pyrene actin, ▲ - Test buffer  
970 (1.5%  $\beta$ -cyclodextrin in PBS) and pyrene actin (control), X - 20  $\mu$ L of test buffer containing 20  $\mu$ g  
971 of occidiofungin and pyrene actin.

972 S6 Figure: Visualization of actin filaments: a) Untreated F-actin filaments stained with phalloidin  
973 670 dye; Alkyne-OF treated F-actin filaments stained with azide derivatized AlexaFluor488 [(b)-  
974 (40x); (c)- (100x)]

975



## FIGURE LEGENDS

Figure 1. Covalent structure of occidiofungin A-D and alkyne-OF.

Figure 2. *Candida albicans* morphology under hyphae inducing conditions. (A) The resulting morphology was scored as either ‘yeast’ or ‘filamentous’ at two hours and the resulting percent given. The data is presented as the average with the standard deviation for over 200 cells from each treatment condition (n=3). (B) The resulting cell morphology was scored as either ‘yeast’ (open circles) or ‘filamentous’ (closed triangles) after 0, 1, 2, 4, and 6 hours at 37°C. The data is presented as the average with the standard deviation for over 200 cells from each treatment condition (n=3). DMSO treated samples are represented by blue lines; Occidiofungin treated samples represented by red lines.

Figure 3. Effect of the native occidiofungin on endocytosis in fission yeast: DIC (top row) and fluorescence (bottom row) images of cells stained using FM-464 following treatment with sample blank (left column), 0.5x MIC of occidiofungin (middle column), and 1x MIC occidiofungin (last column). FM-464 dye uptake by endocytosis decreases in cells exposed to occidiofungin a dose dependent fashion.

Figure 4. Determination of *in vivo* interaction of occidiofungin: A) Representative samples obtained following affinity purification of whole cell extracts run on 12% SDS PAGE gels and stained with Coomassie blue (top) and silver staining (bottom). The Coomassie stained gel was run only until the proteins entered the separating phase whereas the silver stained gel was allowed to run completely. The bands in the Coomassie stained gel (demarcated by the arrows) were removed and used for LC-MS/MS analysis to determine the proteins. Broad range (10-250kDa) ladder was used on both gels; B) Cellular distribution of the proteins obtained in the pull-down assay following LC-MS/MS analysis.

Figure 5. *In vitro* interaction of occidiofungin with F- and G-actin: a) Affinity pulldown of actin using alkyne-OF: Lane 1- Ladder, Lane 2-100 ng pure F-actin, Lane 3-100 ng pure G-actin, Lane 4-Empty, Lane 5-F-actin treated with alkyne-OF, Lane 6-F-actin treated with native occidiofungin, Lane 7-F-actin treated with DMSO, Lane 8-G-actin treated with alkyne-OF, Lane 9-G-actin treated with native occidiofungin, Lane 10-G-actin treated with DMSO; b) Fluorescence microscopy analysis of the effect of occidiofungin treatment on actin filaments visualized using fluorescently labeled phalloidin: A: actin filaments treated with solvent blank (DMSO), B: Actin:native occidiofungin (24 µg actin:4 µg native occidiofungin), C: Actin:native occidiofungin (24 µg actin:8 µg native occidiofungin). Scale bar represents 5µm.

Fig 6. Isothermal titration calorimetry is used to measure occidiofungin (OF) binding to actin. A) Thermogram showing the heat exchange from equal injections of a solution containing OF into the ITC chamber containing actin. B) A representative binding isotherm of the integrated heat change from each injection shown in A is fit to a single-ligand binding model to yield an OF-actin dissociation constant. The mean and standard deviation from three independent experiments are  $K_D = 1.0 \pm 0.8 \mu\text{M}$ .

Fig 7. Co-sedimentation assay to demonstrate binding of occidiofungin to actin. A) Binding curve of phalloidin to actin ( $K_d = 8 \text{ nM}$  and the stoichiometry (ligand : protein) is 0.6:1.0) and B) Binding curve of occidiofungin to actin ( $K_d = 1 \mu\text{M}$  and the stoichiometry (ligand : protein) is 24:1). The graph is plotted between amount of free occidiofungin obtained in the supernatant of the co-sedimentation assay and the amount of bound occidiofungin obtained from the actin pellet. The data was fit to a standard Langmuir binding isotherm of the form:  $[X]_{\text{bound}} = [X] * S / (K_d + [X])$ , where S is the maximal X bound,  $K_d$  is the dissociation constant and X is the concentration of free ligand.

Figure 8. Competition assay of native occidiofungin and alkyne-OF. Time course analysis (A-C) of alkyne-OF distribution and the distribution of alkyne-OF with the competition of native occidiofungin (D-F) in a) *Schizosaccharomyces pombe* and b) *Saccharomyces cerevisiae*. Arrows indicate specific localization patterns of alkyne-OF observed in each cell at 10, 30, and 60 minutes. When pretreated with native occidiofungin, alkyne-OF does not bind or is restricted to cellular envelope in *Schizosaccharomyces pombe* and *Saccharomyces cerevisiae*, respectively.

Figure 9. Effects of occidiofungin exposure on the integrity of actin cables in *S. cerevisiae* cells. A montage of cells processed for actin visualization using phalloidin-TRITC from: a) a culture exposed to solvent blank control (DMSO) where actin patches and cables are easily identifiable; and b) an occidiofungin treated culture (0.5X MIC; for 30 minutes) showing loss of actin cables and the accumulation of actin aggregates. Scale bars represent  $2 \mu\text{m}$ . The arrows are used to demarcate the presence of actin cables.

Figure 10. Efficacy of occidiofungin in treating murine vulvovaginal candidiasis. The graph demonstrates CFUS per ml of *Candida albicans* in the control group of mice compared to the groups treated intravaginally with different concentrations of occidiofungin in 0.3% noble agar. Error bars represent standard deviation.

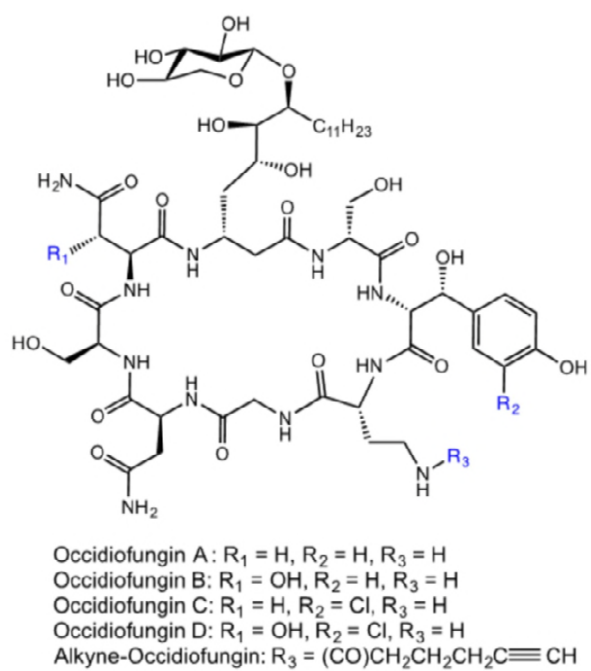

Figure 1. Covalent structure of occidiofungin A-D and alkyne-OF.

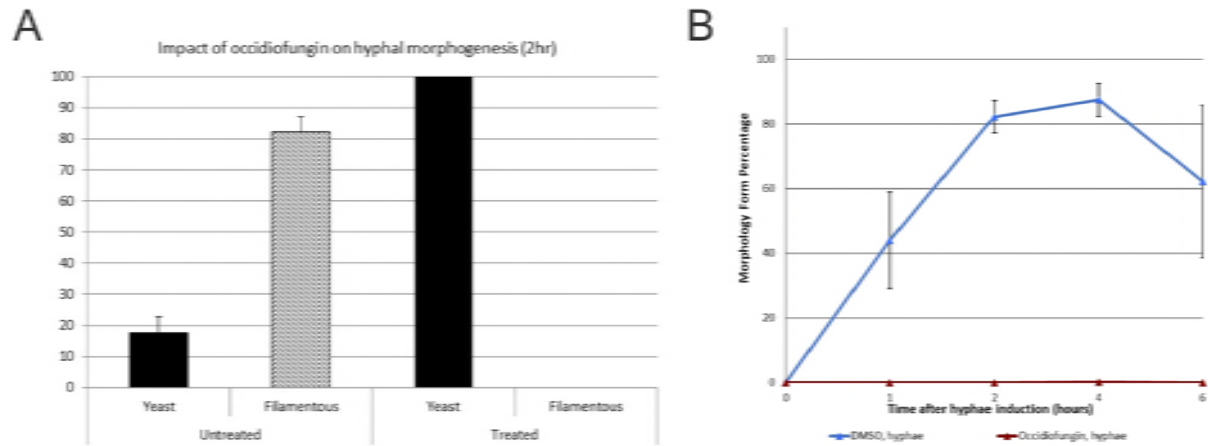

Figure 2. *Candida albicans* morphology under hyphae inducing conditions. (A) The resulting morphology was scored as either ‘yeast’ or ‘filamentous’ at two hours and the resulting percent given. The data is presented as the average with the standard deviation for over 200 cells from each treatment condition (n=3). (B) The resulting cell morphology was scored as either ‘yeast’ (open circles) or ‘filamentous’ (closed triangles) after 0, 1, 2, 4, and 6 hours at 37°C. The data is presented as the average with the standard deviation for over 200 cells from each treatment condition (n=3). DMSO treated samples are represented by blue lines; Occidiofungin treated samples represented by red lines.

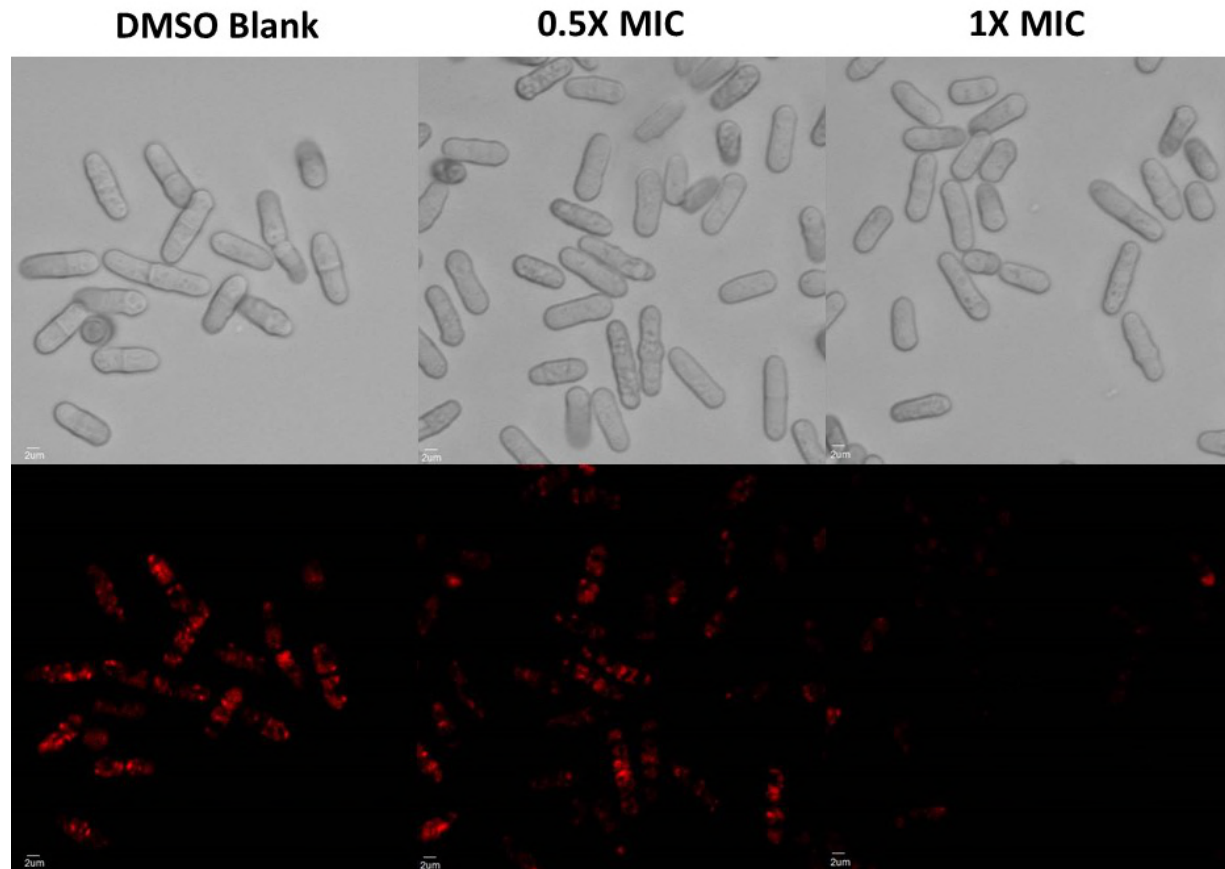

Figure 3. Effect of the native occidiofungin on endocytosis in fission yeast: DIC (top row) and fluorescence (bottom row) images of cells stained using FM-464 following treatment with sample blank (left column), 0.5x MIC of occidiofungin (middle column), and 1x MIC occidiofungin (last column). FM-464 dye uptake by endocytosis decreases in cells exposed to occidiofungin a dose dependent fashion.

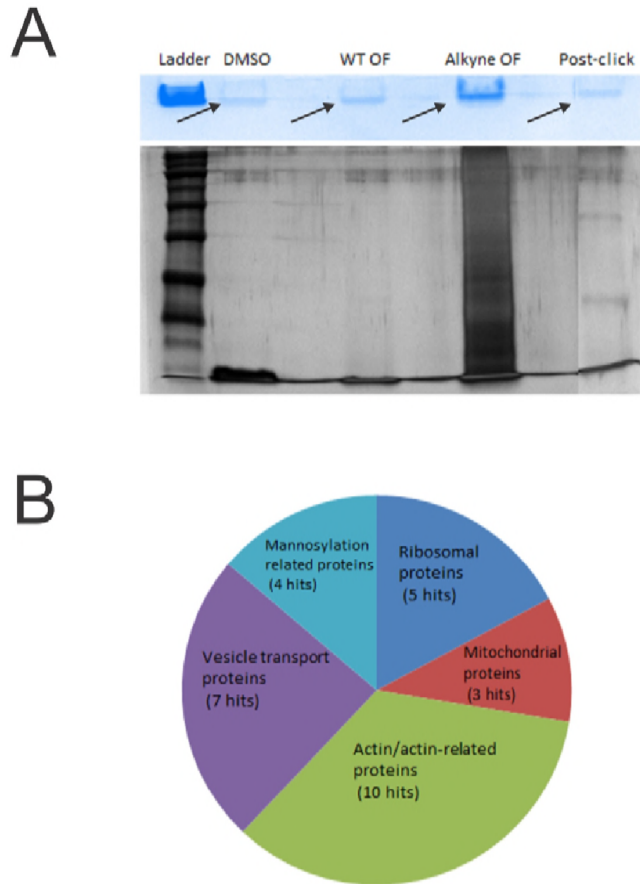

Figure 4. Determination of *in vivo* interaction of occidiofungin: A) Representative samples obtained following affinity purification of whole cell extracts run on 12% SDS PAGE gels and stained with Coomassie blue (top) and silver staining (bottom). The Coomassie stained gel was run only until the proteins entered the separating phase whereas the silver stained gel was allowed to run completely. The bands in the Coomassie stained gel (demarcated by the arrows) were removed and used for LC-MS/MS analysis to determine the proteins. Broad range (10-250kDa) ladder was used on both gels; B) Cellular distribution of the proteins obtained in the pull-down assay following LC-MS/MS analysis.

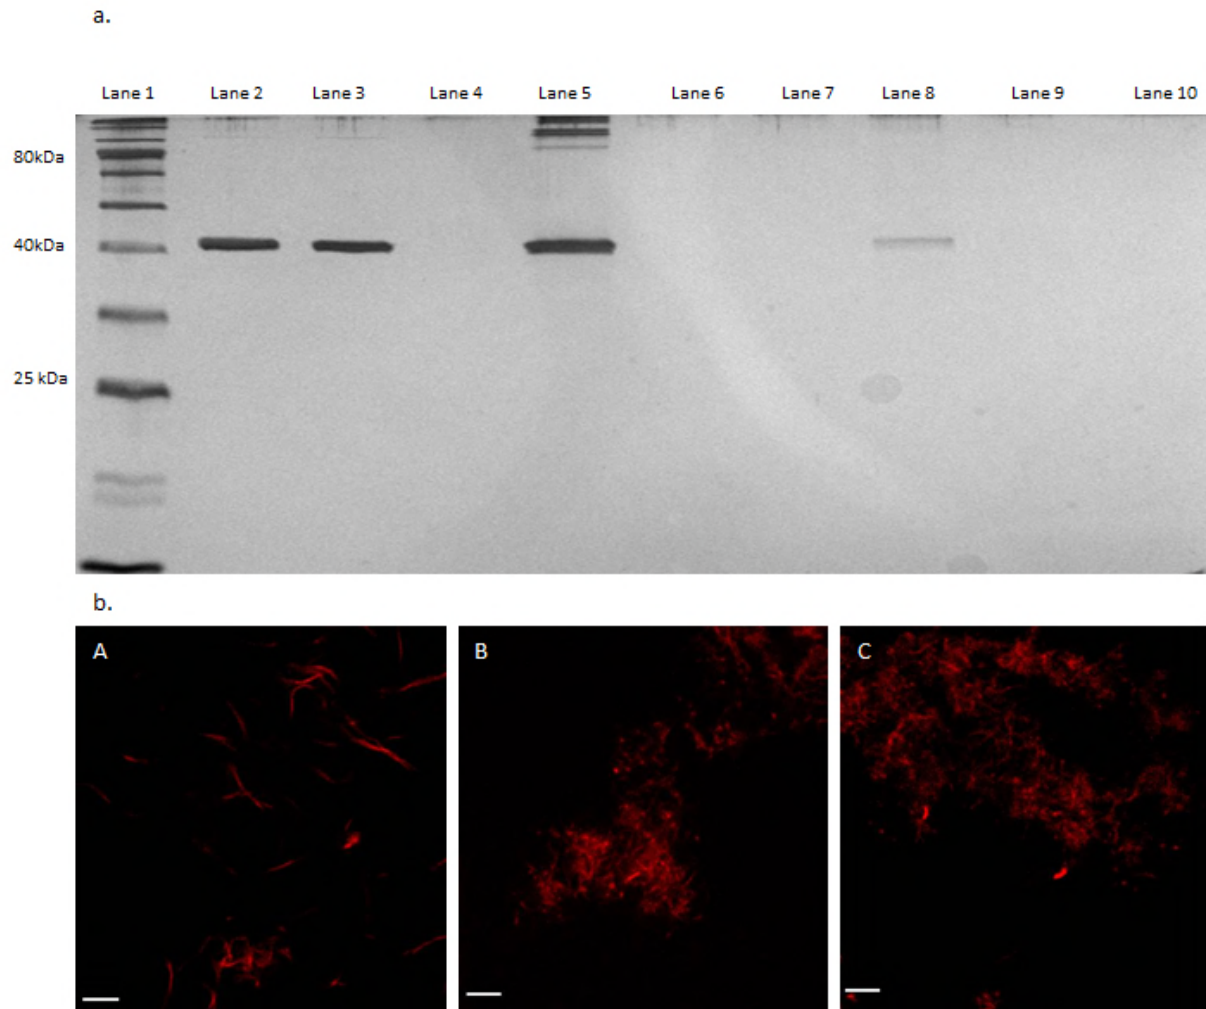

Figure 5. *In vitro* interaction of occidiofungin with F- and G-actin: a) Affinity pulldown of actin using alkyne-OF: Lane 1- Ladder, Lane 2-100 ng pure F-actin, Lane 3-100 ng pure G-actin, Lane 4-Empty, Lane 5-F-actin treated with alkyne-OF, Lane 6-F-actin treated with native occidiofungin, Lane 7-F-actin treated with DMSO, Lane 8-G-actin treated with alkyne-OF, Lane 9-G-actin treated with native occidiofungin, Lane 10-G-actin treated with DMSO; b) Fluorescence microscopy analysis of the effect of occidiofungin treatment on actin filaments visualized using fluorescently labeled phalloidin: A: actin filaments treated with solvent blank (DMSO), B: Actin:native occidiofungin (24  $\mu$ g actin:4  $\mu$ g native occidiofungin), C: Actin:native occidiofungin (24  $\mu$ g actin:8  $\mu$ g native occidiofungin). Scale bar represents 5 $\mu$ m.

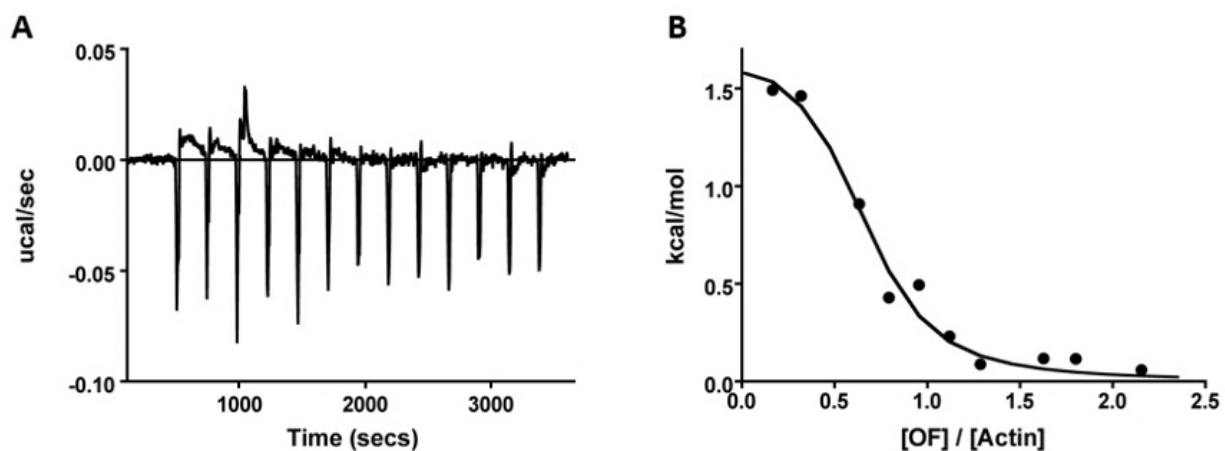

Fig 6. Isothermal titration calorimetry is used to measure occidiofungin (OF) binding to actin. A) Thermogram showing the heat exchange from equal injections of a solution containing OF into the ITC chamber containing actin. B) A representative binding isotherm of the integrated heat change from each injection shown in A is fit to a single-ligand binding model to yield an OF-actin dissociation constant. The mean and standard deviation from three independent experiments are  $K_D = 1.0 \pm 0.8 \mu\text{M}$ .



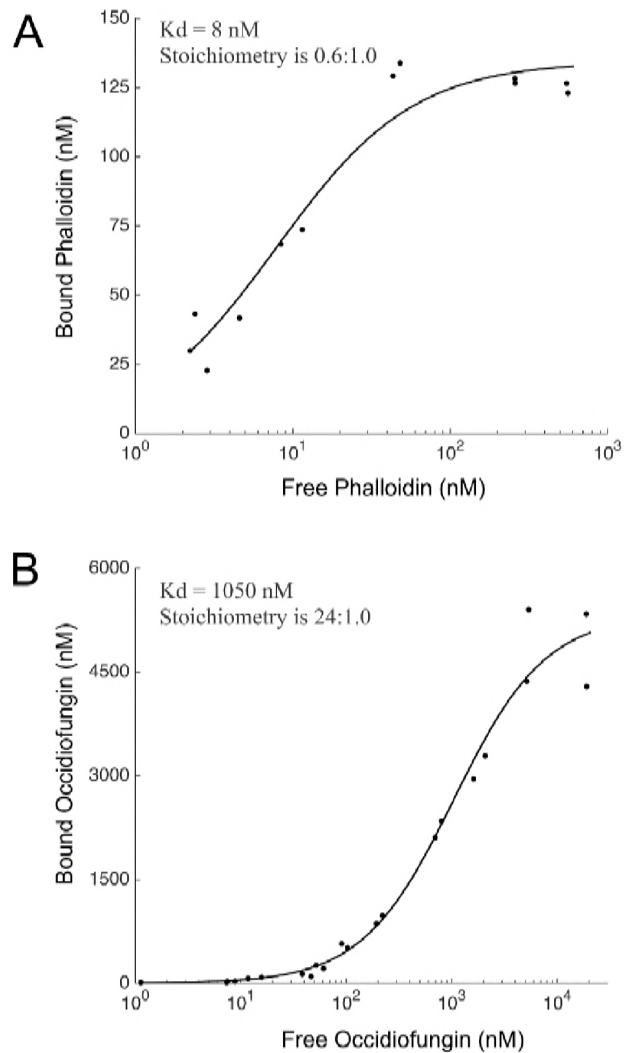

Fig 7. Co-sedimentation assay to demonstrate binding of occidiofungin to actin. A) Binding curve of phalloidin to actin ( $K_d = 8$  nM and the stoichiometry (ligand : protein) is 0.6:1.0) and B) Binding curve of occidiofungin to actin ( $K_d = 1\mu\text{M}$  and the stoichiometry (ligand : protein) is 24:1). The graph is plotted between amount of free occidiofungin obtained in the supernatant of the co-sedimentation assay and the amount of bound occidiofungin obtained from the actin pellet. The data was fit to a standard Langmuir binding isotherm of the form:  $[X]_{\text{bound}} = [X] \cdot S / (K_d + [X])$ , where S is the maximal X bound,  $K_d$  is the dissociation constant and X is the concentration of free ligand.

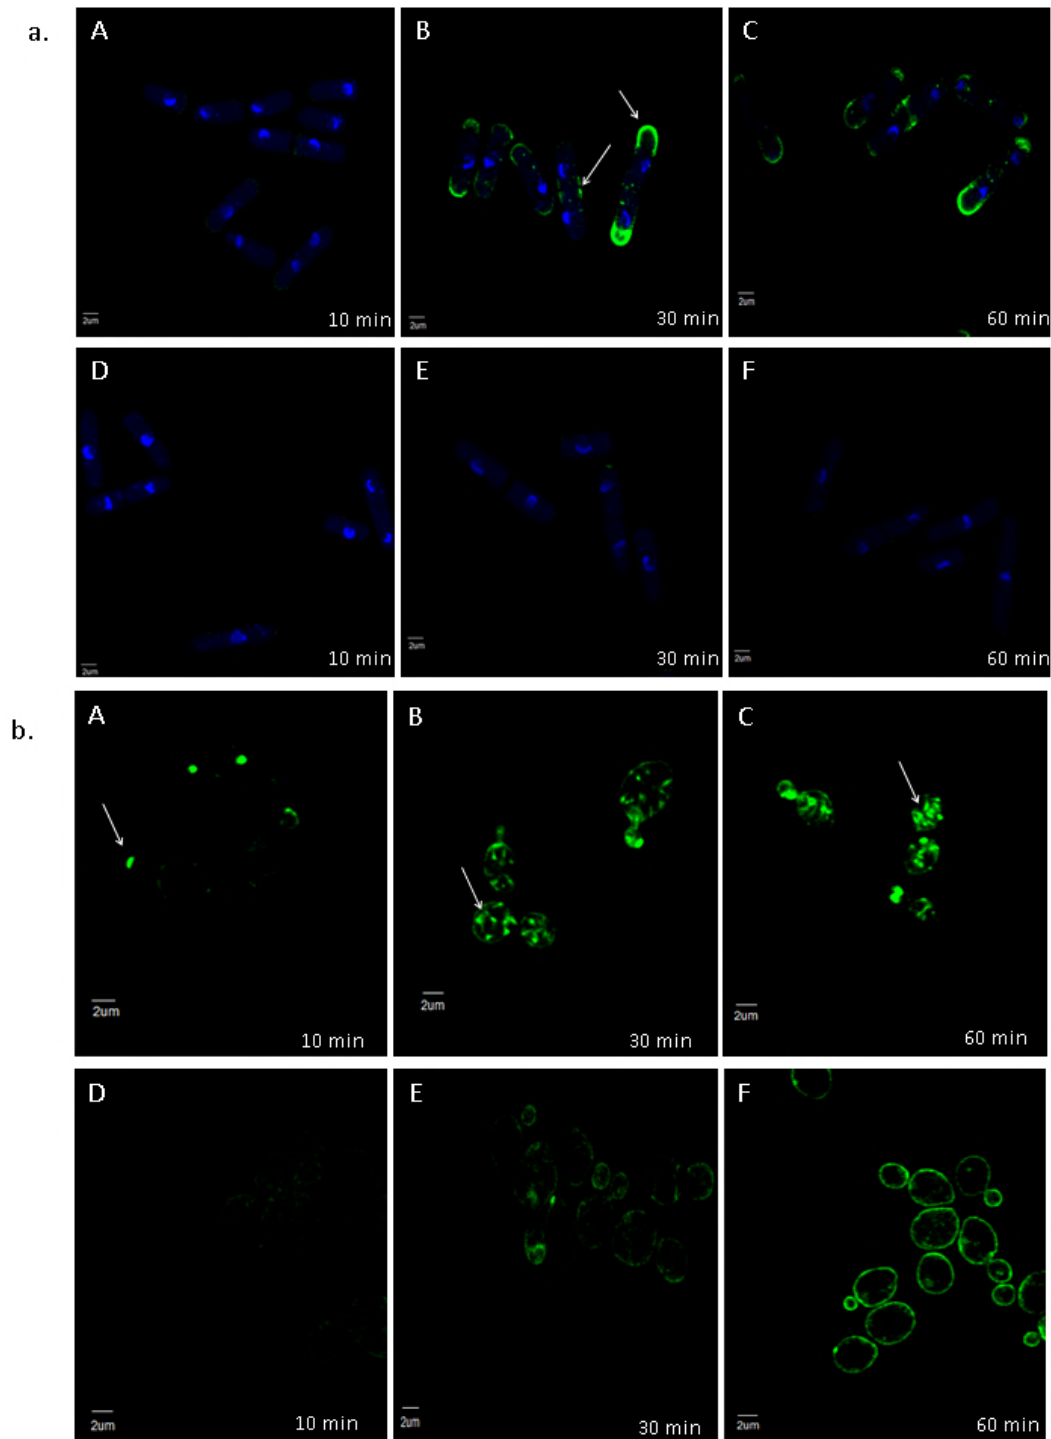

Figure 8. Competition assay of native occidiofungin and alkyne-OF. Time course analysis (A-C) of alkyne-OF distribution and the distribution of alkyne-OF with the competition of native occidiofungin (D-F) in a) *Schizosaccharomyces pombe* and b) *Saccharomyces cerevisiae*. Arrows indicate specific localization patterns of alkyne-OF observed in each cell at 10, 30, and 60 minutes. When pretreated with native occidiofungin, alkyne-OF does not bind or is restricted to cellular envelope in *Schizosaccharomyces pombe* and *Saccharomyces cerevisiae*, respectively.

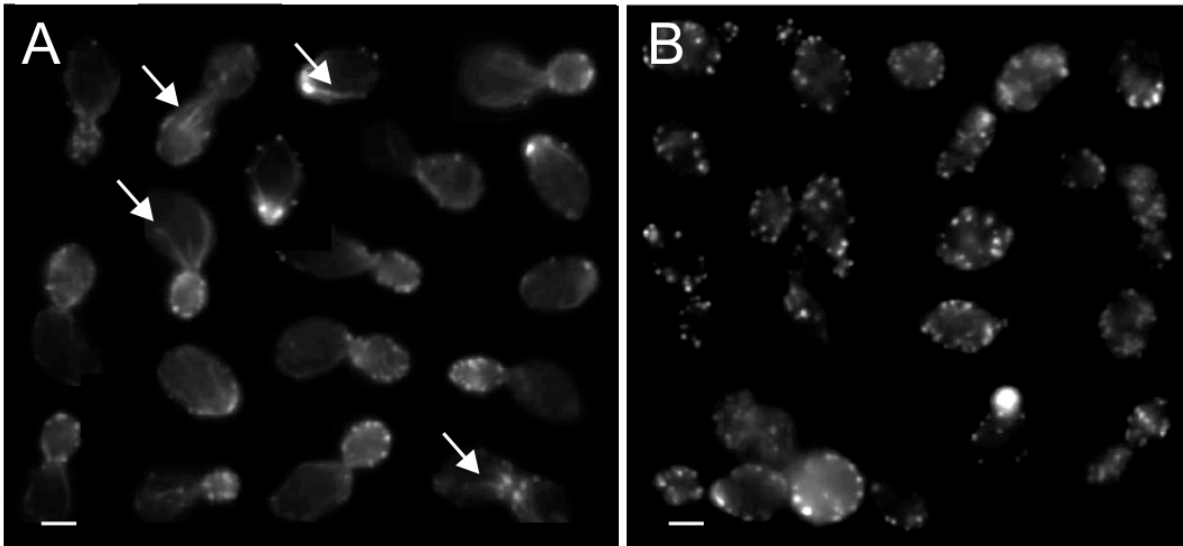

Figure 9. Effects of occidiofungin exposure on the integrity of actin cables in *S. cerevisiae* cells. A montage of cells processed for actin visualization using phalloidin-TRITC from: a) a culture exposed to solvent blank control (DMSO) where actin patches and cables are easily identifiable; and b) an occidiofungin treated culture (0.5X MIC; for 30 minutes) showing loss of actin cables and the accumulation of actin aggregates. Scale bars represent 2 $\mu$ m. The arrows are used to demarcate the presence of actin cables.

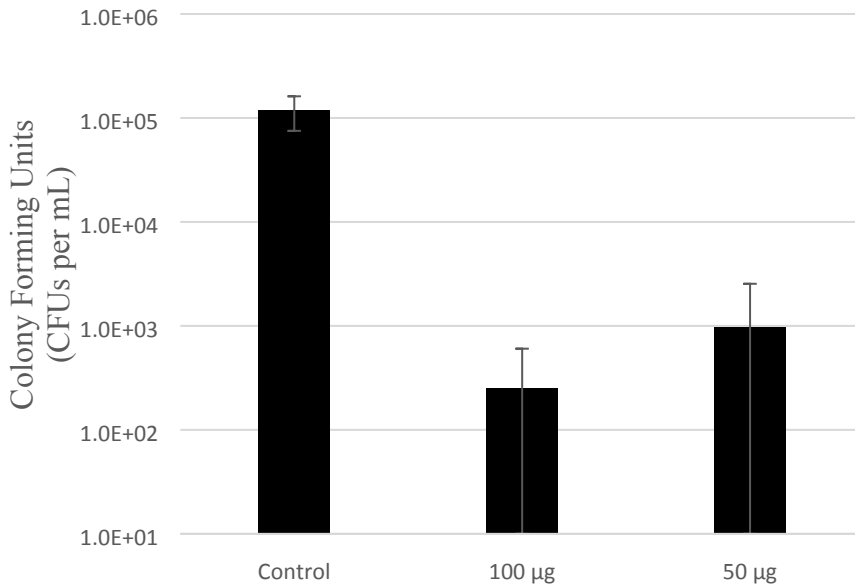

Figure 10. Efficacy of occidiofungin in treating murine vulvovaginal candidiasis. The graph demonstrates CFUS per ml of *Candida albicans* in the control group of mice compared to the groups treated intravaginally with different concentrations of occidiofungin in 0.3% noble agar. Error bars represent standard deviation.
